# Supplementary material for: Identification of Potential ceRNA Network and Patterns of Immune Cell Infiltration in Systemic Sclerosis-Associated Interstitial Lung Disease
Source: Front Cell Dev Biol. 2021 Jun 17;9:622021. doi: 10.3389/fcell.2021.622021 (PMC8248550; doi:10.3389/fcell.2021.622021)
Supplement: Supplementary file 1 [file Data_Sheet_1.XLSX]

## Sheet: Sheet1
miRNA	Target Gene	miRDB	miRTarBase	TargetScan	Sum
hsa-let-7e-5p	GPR26	1	0	1	2
hsa-let-7e-5p	MFSD4A	1	0	0	1
hsa-let-7e-5p	XK	1	0	1	2
hsa-let-7e-5p	PTPRO	1	0	0	1
hsa-let-7e-5p	FSTL4	0	0	1	1
hsa-let-7e-5p	UBXN2B	0	1	0	1
hsa-let-7e-5p	COL6A1	0	1	0	1
hsa-let-7e-5p	HTR4	1	0	1	2
hsa-let-7e-5p	POLR3A	1	0	0	1
hsa-let-7e-5p	ZNF587	1	1	0	2
hsa-let-7e-5p	PLA2G3	1	0	1	2
hsa-let-7e-5p	ACER3	0	0	1	1
hsa-let-7e-5p	SLC7A14	1	0	1	2
hsa-let-7e-5p	KATNBL1	1	0	1	2
hsa-let-7e-5p	ARL4D	1	0	1	2
hsa-let-7e-5p	RICTOR	1	0	1	2
hsa-let-7e-5p	CCDC106	0	1	0	1
hsa-let-7e-5p	SPPL2B	1	0	0	1
hsa-let-7e-5p	ELF4	1	0	1	2
hsa-let-7e-5p	C2orf88	0	0	1	1
hsa-let-7e-5p	PDLIM5	0	1	0	1
hsa-let-7e-5p	DAB1	0	0	1	1
hsa-let-7e-5p	USP12	1	0	1	2
hsa-let-7e-5p	ATG10	1	0	0	1
hsa-let-7e-5p	CTPS2	1	0	0	1
hsa-let-7e-5p	ADGRL3	1	0	0	1
hsa-let-7e-5p	HAND2	0	0	1	1
hsa-let-7e-5p	EPHA3	1	0	1	2
hsa-let-7e-5p	VPS13D	0	1	0	1
hsa-let-7e-5p	PLXNA2	0	0	1	1
hsa-let-7e-5p	GNS	0	0	1	1
hsa-let-7e-5p	SIGMAR1	1	0	0	1
hsa-let-7e-5p	LIPH	1	0	1	2
hsa-let-7e-5p	SPOCD1	0	0	1	1
hsa-let-7e-5p	CCDC71L	1	0	1	2
hsa-let-7e-5p	HIST1H2BK	0	1	0	1
hsa-let-7e-5p	FRMD4B	1	0	1	2
hsa-let-7e-5p	FZD9	0	1	0	1
hsa-let-7e-5p	EGR3	1	0	1	2
hsa-let-7e-5p	ASAP1	1	0	1	2
hsa-let-7e-5p	AC008443.1	0	0	1	1
hsa-let-7e-5p	COPG1	0	1	0	1
hsa-let-7e-5p	RBM12B	0	1	0	1
hsa-let-7e-5p	LINGO1	1	0	1	2
hsa-let-7e-5p	NKAP	0	0	1	1
hsa-let-7e-5p	RPL12	0	1	0	1
hsa-let-7e-5p	ZNF200	1	1	1	3
hsa-let-7e-5p	DCAF15	1	0	1	2
hsa-let-7e-5p	PRKAA2	1	0	1	2
hsa-let-7e-5p	GALNT15	1	0	1	2
hsa-let-7e-5p	RABL6	0	1	0	1
hsa-let-7e-5p	FARP1	1	0	1	2
hsa-let-7e-5p	TRAPPC10	0	1	0	1
hsa-let-7e-5p	RAB3GAP2	1	0	1	2
hsa-let-7e-5p	FNIP2	1	0	1	2
hsa-let-7e-5p	C1orf21	0	1	0	1
hsa-let-7e-5p	SLC5A6	1	1	1	3
hsa-let-7e-5p	AEN	1	0	1	2
hsa-let-7e-5p	PDCD11	0	1	0	1
hsa-let-7e-5p	AASS	0	0	1	1
hsa-let-7e-5p	GPR157	0	0	1	1
hsa-let-7e-5p	PLCG2	1	1	0	2
hsa-let-7e-5p	DNAJB9	0	0	1	1
hsa-let-7e-5p	ADH5	0	1	0	1
hsa-let-7e-5p	ZNF354B	0	0	1	1
hsa-let-7e-5p	STON2	1	0	0	1
hsa-let-7e-5p	SURF4	1	1	1	3
hsa-let-7e-5p	THRSP	1	0	1	2
hsa-let-7e-5p	CYB561D1	1	0	1	2
hsa-let-7e-5p	YAE1D1	0	1	0	1
hsa-let-7e-5p	TNFAIP1	0	1	0	1
hsa-let-7e-5p	RBM19	1	0	0	1
hsa-let-7e-5p	CARM1	0	1	0	1
hsa-let-7e-5p	PIK3IP1	1	0	1	2
hsa-let-7e-5p	PLK1	0	1	0	1
hsa-let-7e-5p	IKBKE	0	0	1	1
hsa-let-7e-5p	GREB1L	0	0	1	1
hsa-let-7e-5p	MOB4	1	0	1	2
hsa-let-7e-5p	MEIS3	1	0	0	1
hsa-let-7e-5p	WAPAL	0	0	1	1
hsa-let-7e-5p	ZFAND5	0	1	0	1
hsa-let-7e-5p	KPNA1	1	0	1	2
hsa-let-7e-5p	RALB	1	0	1	2
hsa-let-7e-5p	SLC12A9	1	0	1	2
hsa-let-7e-5p	RBM8A	0	1	0	1
hsa-let-7e-5p	ICOSLG	0	1	0	1
hsa-let-7e-5p	SKA2	0	1	0	1
hsa-let-7e-5p	BZW1	1	1	1	3
hsa-let-7e-5p	AKAP8	0	1	0	1
hsa-let-7e-5p	TSC22D2	1	1	1	3
hsa-let-7e-5p	SLC38A7	0	1	0	1
hsa-let-7e-5p	GABRA6	1	0	1	2
hsa-let-7e-5p	PQLC2	1	0	1	2
hsa-let-7e-5p	CGNL1	1	0	1	2
hsa-let-7e-5p	PPARGC1A	0	0	1	1
hsa-let-7e-5p	ANKRD46	1	1	1	3
hsa-let-7e-5p	STK24	1	0	1	2
hsa-let-7e-5p	XPOT	0	0	1	1
hsa-let-7e-5p	GPX7	1	0	0	1
hsa-let-7e-5p	AMMECR1L	1	0	1	2
hsa-let-7e-5p	RAB19	0	1	0	1
hsa-let-7e-5p	SYT1	1	1	1	3
hsa-let-7e-5p	GFOD1	1	0	0	1
hsa-let-7e-5p	STXBP5	1	0	1	2
hsa-let-7e-5p	ZFP3	0	1	0	1
hsa-let-7e-5p	ARIH1	0	1	0	1
hsa-let-7e-5p	PSORS1C2	1	0	1	2
hsa-let-7e-5p	BNC2	0	0	1	1
hsa-let-7e-5p	VARS	0	1	0	1
hsa-let-7e-5p	ANKRD52	1	0	1	2
hsa-let-7e-5p	RSL1D1	0	1	0	1
hsa-let-7e-5p	RASA4	1	0	0	1
hsa-let-7e-5p	COL9A3	0	0	1	1
hsa-let-7e-5p	SKIL	1	0	1	2
hsa-let-7e-5p	ENSA	0	1	0	1
hsa-let-7e-5p	ATP2A2	1	0	1	2
hsa-let-7e-5p	FAM20A	1	0	0	1
hsa-let-7e-5p	LRRC41	0	1	0	1
hsa-let-7e-5p	RGS17	0	0	1	1
hsa-let-7e-5p	SOD2	0	1	0	1
hsa-let-7e-5p	MAP2K7	0	1	0	1
hsa-let-7e-5p	G3BP1	0	0	1	1
hsa-let-7e-5p	SDR42E1	1	1	0	2
hsa-let-7e-5p	COL9A1	1	0	1	2
hsa-let-7e-5p	RBFOX2	1	1	1	3
hsa-let-7e-5p	MYO5B	1	0	1	2
hsa-let-7e-5p	TXLNA	1	1	1	3
hsa-let-7e-5p	B3GNT1	0	0	1	1
hsa-let-7e-5p	DST	1	0	1	2
hsa-let-7e-5p	FASTK	0	0	1	1
hsa-let-7e-5p	LEPROTL1	1	0	1	2
hsa-let-7e-5p	SCN8A	0	0	1	1
hsa-let-7e-5p	STK4	0	1	0	1
hsa-let-7e-5p	ZFYVE26	1	0	1	2
hsa-let-7e-5p	YPEL2	1	0	1	2
hsa-let-7e-5p	YAF2	0	0	1	1
hsa-let-7e-5p	OSTF1	1	0	1	2
hsa-let-7e-5p	TET2	1	0	1	2
hsa-let-7e-5p	BSDC1	0	1	0	1
hsa-let-7e-5p	SALL4	1	0	1	2
hsa-let-7e-5p	NRSN2	0	1	0	1
hsa-let-7e-5p	ERCC6	1	0	1	2
hsa-let-7e-5p	SMC1A	1	1	1	3
hsa-let-7e-5p	DPP3	1	0	1	2
hsa-let-7e-5p	CDKN1A	1	1	1	3
hsa-let-7e-5p	ARMC8	1	0	1	2
hsa-let-7e-5p	CDH18	0	1	0	1
hsa-let-7e-5p	FKRP	1	0	1	2
hsa-let-7e-5p	NUDT8	0	1	0	1
hsa-let-7e-5p	ACTR10	1	0	0	1
hsa-let-7e-5p	TIAF1	0	1	0	1
hsa-let-7e-5p	LPHN3	0	0	1	1
hsa-let-7e-5p	ADRBK2	0	0	1	1
hsa-let-7e-5p	LOXL4	1	0	1	2
hsa-let-7e-5p	PRRX1	1	0	1	2
hsa-let-7e-5p	RBMS1	1	0	1	2
hsa-let-7e-5p	TRMT13	1	0	0	1
hsa-let-7e-5p	SCD	1	1	1	3
hsa-let-7e-5p	IRGQ	0	1	1	2
hsa-let-7e-5p	ZSWIM5	1	0	1	2
hsa-let-7e-5p	ADAMTS14	0	0	1	1
hsa-let-7e-5p	SCN4B	1	0	1	2
hsa-let-7e-5p	ARID3B	1	1	1	3
hsa-let-7e-5p	TMPPE	1	0	1	2
hsa-let-7e-5p	SOWAHA	1	0	1	2
hsa-let-7e-5p	C1GALT1	1	0	1	2
hsa-let-7e-5p	PRDM1	1	0	1	2
hsa-let-7e-5p	FCAR	1	0	0	1
hsa-let-7e-5p	ONECUT2	1	1	1	3
hsa-let-7e-5p	WARS2	1	0	1	2
hsa-let-7e-5p	AGO3	1	0	1	2
hsa-let-7e-5p	CLPB	0	0	1	1
hsa-let-7e-5p	MYCBP	1	0	1	2
hsa-let-7e-5p	MTMR12	0	0	1	1
hsa-let-7e-5p	ARL5B	0	0	1	1
hsa-let-7e-5p	NDST2	1	0	1	2
hsa-let-7e-5p	SBNO1	1	0	1	2
hsa-let-7e-5p	TNFRSF1A	0	1	0	1
hsa-let-7e-5p	SOGA3	1	0	0	1
hsa-let-7e-5p	OTUB2	0	0	1	1
hsa-let-7e-5p	NEK3	1	0	1	2
hsa-let-7e-5p	CELF2	0	1	0	1
hsa-let-7e-5p	C11orf57	1	1	1	3
hsa-let-7e-5p	PGD	0	1	0	1
hsa-let-7e-5p	BTN2A1	1	0	0	1
hsa-let-7e-5p	TBC1D19	0	1	0	1
hsa-let-7e-5p	COX1	0	1	0	1
hsa-let-7e-5p	ZNF462	0	0	1	1
hsa-let-7e-5p	SPIRE1	0	0	1	1
hsa-let-7e-5p	GJC1	1	0	1	2
hsa-let-7e-5p	SEMA4F	1	0	1	2
hsa-let-7e-5p	ETNK2	1	0	1	2
hsa-let-7e-5p	FAM105A	0	1	0	1
hsa-let-7e-5p	PARP8	1	0	1	2
hsa-let-7e-5p	RAP1A	0	1	0	1
hsa-let-7e-5p	SLC25A32	0	0	1	1
hsa-let-7e-5p	KIAA1429	1	0	0	1
hsa-let-7e-5p	ADAMTS5	1	0	1	2
hsa-let-7e-5p	SMAD2	1	0	1	2
hsa-let-7e-5p	USP6	1	0	1	2
hsa-let-7e-5p	UBE2H	0	1	0	1
hsa-let-7e-5p	NF1	0	1	0	1
hsa-let-7e-5p	TBC1D31	0	1	0	1
hsa-let-7e-5p	GPR61	0	0	1	1
hsa-let-7e-5p	PALM3	1	0	1	2
hsa-let-7e-5p	CASK	0	0	1	1
hsa-let-7e-5p	SLC31A2	1	0	0	1
hsa-let-7e-5p	HDLBP	1	0	1	2
hsa-let-7e-5p	DNAJA2	1	0	1	2
hsa-let-7e-5p	MEF2C	1	0	1	2
hsa-let-7e-5p	RHBDF2	0	1	0	1
hsa-let-7e-5p	CECR6	1	0	1	2
hsa-let-7e-5p	CRTAP	1	0	1	2
hsa-let-7e-5p	SESN3	1	0	1	2
hsa-let-7e-5p	RRAGC	0	1	0	1
hsa-let-7e-5p	PKIA	0	0	1	1
hsa-let-7e-5p	IDH2	1	0	1	2
hsa-let-7e-5p	STRN	1	1	1	3
hsa-let-7e-5p	SPATA13	0	1	1	2
hsa-let-7e-5p	PRR18	0	0	1	1
hsa-let-7e-5p	GATM	1	1	1	3
hsa-let-7e-5p	DOCK3	1	0	1	2
hsa-let-7e-5p	EIF4EBP2	0	1	0	1
hsa-let-7e-5p	RPS6KA3	1	0	1	2
hsa-let-7e-5p	TUBB4B	0	1	0	1
hsa-let-7e-5p	SULF1	0	0	1	1
hsa-let-7e-5p	BRWD1	1	0	0	1
hsa-let-7e-5p	COX6B1	0	1	0	1
hsa-let-7e-5p	SLC10A7	1	1	1	3
hsa-let-7e-5p	GALNT4	1	0	1	2
hsa-let-7e-5p	KIAA1147	0	0	1	1
hsa-let-7e-5p	ALG13	0	1	0	1
hsa-let-7e-5p	SPAG9	0	1	0	1
hsa-let-7e-5p	FAM83G	0	1	1	2
hsa-let-7e-5p	ITGA1	0	0	1	1
hsa-let-7e-5p	COL4A3BP	1	0	1	2
hsa-let-7e-5p	ZNF460	0	1	0	1
hsa-let-7e-5p	PDP2	1	1	1	3
hsa-let-7e-5p	ZNF256	0	1	0	1
hsa-let-7e-5p	HOXC11	0	0	1	1
hsa-let-7e-5p	CDC42SE1	0	0	1	1
hsa-let-7e-5p	TTLL12	0	1	0	1
hsa-let-7e-5p	PITPNM3	1	0	1	2
hsa-let-7e-5p	KCNA6	0	0	1	1
hsa-let-7e-5p	POLR3D	1	1	1	3
hsa-let-7e-5p	C12orf4	0	1	0	1
hsa-let-7e-5p	HIPK2	0	0	1	1
hsa-let-7e-5p	RNFT1	0	1	1	2
hsa-let-7e-5p	ZNF443	1	1	0	2
hsa-let-7e-5p	SENP2	1	0	1	2
hsa-let-7e-5p	BTRC	0	1	0	1
hsa-let-7e-5p	USP37	0	1	0	1
hsa-let-7e-5p	FBXL19	0	0	1	1
hsa-let-7e-5p	KIAA1161	1	0	1	2
hsa-let-7e-5p	HS2ST1	1	0	1	2
hsa-let-7e-5p	ZNF609	0	1	0	1
hsa-let-7e-5p	NICN1	0	1	0	1
hsa-let-7e-5p	PARS2	1	0	0	1
hsa-let-7e-5p	PRKAR2A	1	0	1	2
hsa-let-7e-5p	CTC1	0	1	0	1
hsa-let-7e-5p	COL24A1	0	0	1	1
hsa-let-7e-5p	SSB	0	1	0	1
hsa-let-7e-5p	COL1A1	1	0	1	2
hsa-let-7e-5p	GALC	1	0	1	2
hsa-let-7e-5p	DIP2A	1	0	0	1
hsa-let-7e-5p	CCDC141	1	0	1	2
hsa-let-7e-5p	PPP2R1A	0	1	0	1
hsa-let-7e-5p	GPAT4	1	1	0	2
hsa-let-7e-5p	MFSD8	1	1	0	2
hsa-let-7e-5p	NDUFA3	0	1	0	1
hsa-let-7e-5p	FNDC3B	1	0	1	2
hsa-let-7e-5p	DENND6A	0	0	1	1
hsa-let-7e-5p	PSMA6	0	1	0	1
hsa-let-7e-5p	PBX2	1	1	1	3
hsa-let-7e-5p	SERF2	1	1	0	2
hsa-let-7e-5p	SLC30A4	1	0	1	2
hsa-let-7e-5p	PIGP	0	1	0	1
hsa-let-7e-5p	TEPSIN	1	0	0	1
hsa-let-7e-5p	MAPK1IP1L	0	0	1	1
hsa-let-7e-5p	EOGT	1	0	1	2
hsa-let-7e-5p	SRGAP1	1	0	1	2
hsa-let-7e-5p	COL8A1	0	1	0	1
hsa-let-7e-5p	CCND2	1	0	1	2
hsa-let-7e-5p	HDHD1	0	0	1	1
hsa-let-7e-5p	MSR1	1	0	0	1
hsa-let-7e-5p	COX14	0	1	0	1
hsa-let-7e-5p	PYCR1	0	1	0	1
hsa-let-7e-5p	IKZF3	1	1	0	2
hsa-let-7e-5p	DVL3	1	1	1	3
hsa-let-7e-5p	TXNDC8	1	0	0	1
hsa-let-7e-5p	PI4K2B	0	0	1	1
hsa-let-7e-5p	ZNF70	0	0	1	1
hsa-let-7e-5p	AREL1	0	1	0	1
hsa-let-7e-5p	SUGP2	0	1	0	1
hsa-let-7e-5p	SRGAP3	0	0	1	1
hsa-let-7e-5p	MASP1	1	0	0	1
hsa-let-7e-5p	GAB3	1	0	0	1
hsa-let-7e-5p	UTRN	1	0	1	2
hsa-let-7e-5p	RDX	1	1	1	3
hsa-let-7e-5p	SFT2D3	1	0	1	2
hsa-let-7e-5p	MYO1F	1	0	1	2
hsa-let-7e-5p	INTS2	1	0	1	2
hsa-let-7e-5p	C2	1	0	0	1
hsa-let-7e-5p	ADAM15	0	0	1	1
hsa-let-7e-5p	LEFTY1	0	1	0	1
hsa-let-7e-5p	EPPIN-WFDC6	1	0	0	1
hsa-let-7e-5p	CTHRC1	1	0	0	1
hsa-let-7e-5p	PAFAH2	0	1	0	1
hsa-let-7e-5p	DIAPH2	0	0	1	1
hsa-let-7e-5p	RPUSD2	1	0	1	2
hsa-let-7e-5p	ZNF354A	1	0	1	2
hsa-let-7e-5p	SEC14L5	1	0	1	2
hsa-let-7e-5p	ND5	0	1	0	1
hsa-let-7e-5p	SEC16B	0	0	1	1
hsa-let-7e-5p	GOLGA7	0	0	1	1
hsa-let-7e-5p	SVIL	0	1	0	1
hsa-let-7e-5p	AQP6	0	1	0	1
hsa-let-7e-5p	ZNF799	1	1	0	2
hsa-let-7e-5p	MAN2A2	1	0	0	1
hsa-let-7e-5p	PIGU	0	0	1	1
hsa-let-7e-5p	LHCGR	1	0	0	1
hsa-let-7e-5p	BACH1	1	1	1	3
hsa-let-7e-5p	CLDN4	0	1	0	1
hsa-let-7e-5p	CPEB3	1	0	1	2
hsa-let-7e-5p	DYRK3	0	1	0	1
hsa-let-7e-5p	CDH22	0	0	1	1
hsa-let-7e-5p	NAT8L	1	1	1	3
hsa-let-7e-5p	DTX3L	0	1	0	1
hsa-let-7e-5p	NLN	0	0	1	1
hsa-let-7e-5p	GALNT1	1	0	1	2
hsa-let-7e-5p	VPS26B	0	0	1	1
hsa-let-7e-5p	ATP6V1F	0	1	0	1
hsa-let-7e-5p	ARHGAP8	1	0	0	1
hsa-let-7e-5p	KLHL6	1	0	1	2
hsa-let-7e-5p	BDP1	0	0	1	1
hsa-let-7e-5p	FAM155A	0	0	1	1
hsa-let-7e-5p	MARCKSL1	0	1	0	1
hsa-let-7e-5p	C1RL	0	1	0	1
hsa-let-7e-5p	HIST1H2BD	0	1	0	1
hsa-let-7e-5p	SLC31A1	1	0	1	2
hsa-let-7e-5p	LIN28A	1	1	1	3
hsa-let-7e-5p	KRBOX4	0	1	0	1
hsa-let-7e-5p	ARG2	1	0	1	2
hsa-let-7e-5p	MMP9	0	1	0	1
hsa-let-7e-5p	IGF2BP3	1	1	1	3
hsa-let-7e-5p	RRP1B	1	0	1	2
hsa-let-7e-5p	LHFPL2	0	1	0	1
hsa-let-7e-5p	NHLRC2	0	1	1	2
hsa-let-7e-5p	LYVE1	1	0	1	2
hsa-let-7e-5p	ARID1A	0	1	0	1
hsa-let-7e-5p	EIF2S2	1	0	1	2
hsa-let-7e-5p	RAVER2	0	0	1	1
hsa-let-7e-5p	LUC7L3	0	0	1	1
hsa-let-7e-5p	EGLN2	1	0	1	2
hsa-let-7e-5p	AMER3	1	0	1	2
hsa-let-7e-5p	SPRYD4	1	0	1	2
hsa-let-7e-5p	ONECUT1	0	0	1	1
hsa-let-7e-5p	MMS22L	1	0	0	1
hsa-let-7e-5p	PLA2G15	0	0	1	1
hsa-let-7e-5p	LIMK2	1	0	1	2
hsa-let-7e-5p	SUOX	0	1	0	1
hsa-let-7e-5p	BAHD1	0	0	1	1
hsa-let-7e-5p	ATG16L1	0	0	1	1
hsa-let-7e-5p	WDR41	1	0	0	1
hsa-let-7e-5p	KLHL23	1	0	1	2
hsa-let-7e-5p	ZNF322	1	0	1	2
hsa-let-7e-5p	PPT2	1	0	0	1
hsa-let-7e-5p	PALD1	1	0	1	2
hsa-let-7e-5p	FRAS1	1	0	1	2
hsa-let-7e-5p	CNTRL	1	0	1	2
hsa-let-7e-5p	SBK1	1	0	1	2
hsa-let-7e-5p	CACNA1I	1	0	1	2
hsa-let-7e-5p	RAB40C	1	1	1	3
hsa-let-7e-5p	RORC	1	0	1	2
hsa-let-7e-5p	LRRC8B	1	0	1	2
hsa-let-7e-5p	ZPLD1	0	0	1	1
hsa-let-7e-5p	STEAP3	1	0	1	2
hsa-let-7e-5p	MON2	1	0	1	2
hsa-let-7e-5p	KIF21B	1	0	1	2
hsa-let-7e-5p	ERGIC2	0	0	1	1
hsa-let-7e-5p	NME6	1	0	1	2
hsa-let-7e-5p	RRM2	1	1	1	3
hsa-let-7e-5p	NEMP1	1	0	0	1
hsa-let-7e-5p	SKIDA1	1	0	1	2
hsa-let-7e-5p	ZNF548	1	0	0	1
hsa-let-7e-5p	SLC10A6	0	0	1	1
hsa-let-7e-5p	LPGAT1	1	0	1	2
hsa-let-7e-5p	SHANK1	0	1	0	1
hsa-let-7e-5p	KCNJ6	0	0	1	1
hsa-let-7e-5p	NAA60	0	1	0	1
hsa-let-7e-5p	CFL2	1	0	1	2
hsa-let-7e-5p	SLCO3A1	0	1	0	1
hsa-let-7e-5p	VSNL1	1	0	1	2
hsa-let-7e-5p	ZBTB8OS	1	1	0	2
hsa-let-7e-5p	TRRAP	0	1	0	1
hsa-let-7e-5p	TEX261	1	0	1	2
hsa-let-7e-5p	SESTD1	1	0	1	2
hsa-let-7e-5p	TNFSF10	1	0	0	1
hsa-let-7e-5p	NCOA1	0	0	1	1
hsa-let-7e-5p	VAV3	1	0	1	2
hsa-let-7e-5p	KRTAP5-8	1	0	0	1
hsa-let-7e-5p	PPARA	1	0	0	1
hsa-let-7e-5p	VCPIP1	0	0	1	1
hsa-let-7e-5p	NR6A1	1	1	1	3
hsa-let-7e-5p	SUMO1	0	1	0	1
hsa-let-7e-5p	HS6ST2	0	1	0	1
hsa-let-7e-5p	ZNF417	0	1	0	1
hsa-let-7e-5p	ICMT	1	0	1	2
hsa-let-7e-5p	KRT5	1	0	0	1
hsa-let-7e-5p	KLHDC8B	1	1	1	3
hsa-let-7e-5p	FBXO21	0	0	1	1
hsa-let-7e-5p	ZNF268	1	0	0	1
hsa-let-7e-5p	MIB1	1	0	1	2
hsa-let-7e-5p	SLC4A4	0	0	1	1
hsa-let-7e-5p	YWHAG	0	1	0	1
hsa-let-7e-5p	CNBP	0	1	0	1
hsa-let-7e-5p	BBX	1	0	1	2
hsa-let-7e-5p	CTNS	0	0	1	1
hsa-let-7e-5p	SNX17	0	1	1	2
hsa-let-7e-5p	ZKSCAN5	0	0	1	1
hsa-let-7e-5p	DDI2	1	0	1	2
hsa-let-7e-5p	OPRM1	1	0	0	1
hsa-let-7e-5p	ZNF202	1	0	1	2
hsa-let-7e-5p	PRR14L	0	0	1	1
hsa-let-7e-5p	RNMT	1	1	0	2
hsa-let-7e-5p	NUGGC	1	0	0	1
hsa-let-7e-5p	PCBP2	0	1	0	1
hsa-let-7e-5p	EZH1	0	0	1	1
hsa-let-7e-5p	KIF27	0	1	0	1
hsa-let-7e-5p	RGS6	1	0	0	1
hsa-let-7e-5p	CCNJ	1	0	1	2
hsa-let-7e-5p	ZNF620	0	0	1	1
hsa-let-7e-5p	REL	0	0	1	1
hsa-let-7e-5p	CPSF4	1	0	1	2
hsa-let-7e-5p	ABHD14B	1	0	0	1
hsa-let-7e-5p	RPL27A	0	1	0	1
hsa-let-7e-5p	KIAA1143	0	1	0	1
hsa-let-7e-5p	PAX2	0	0	1	1
hsa-let-7e-5p	ZNF583	1	0	1	2
hsa-let-7e-5p	KIAA0391	0	1	1	2
hsa-let-7e-5p	KIAA1919	0	0	1	1
hsa-let-7e-5p	CYTH3	1	0	1	2
hsa-let-7e-5p	POGLUT1	1	0	1	2
hsa-let-7e-5p	MYO9B	0	1	0	1
hsa-let-7e-5p	AKAP6	1	0	1	2
hsa-let-7e-5p	KCNJ3	1	0	1	2
hsa-let-7e-5p	RP11-766F14.2	0	0	1	1
hsa-let-7e-5p	RALGPS1	0	0	1	1
hsa-let-7e-5p	PTAFR	1	0	1	2
hsa-let-7e-5p	ATXN2	0	1	0	1
hsa-let-7e-5p	WNT9B	1	0	1	2
hsa-let-7e-5p	CACNA1E	1	0	1	2
hsa-let-7e-5p	RNF5	1	0	0	1
hsa-let-7e-5p	MAPK9	1	0	0	1
hsa-let-7e-5p	TMEM107	0	1	0	1
hsa-let-7e-5p	PLAGL2	1	1	1	3
hsa-let-7e-5p	RAB11FIP2	1	0	0	1
hsa-let-7e-5p	RBMS2	1	0	1	2
hsa-let-7e-5p	GABBR2	1	0	1	2
hsa-let-7e-5p	WIPI2	1	0	1	2
hsa-let-7e-5p	NEK9	0	0	1	1
hsa-let-7e-5p	IGDCC4	1	1	1	3
hsa-let-7e-5p	PMAIP1	0	1	1	2
hsa-let-7e-5p	RRAGD	0	0	1	1
hsa-let-7e-5p	RPSA	0	1	0	1
hsa-let-7e-5p	ARHGAP19	0	1	0	1
hsa-let-7e-5p	LBR	1	0	1	2
hsa-let-7e-5p	HDX	1	0	1	2
hsa-let-7e-5p	PRIM2	0	1	0	1
hsa-let-7e-5p	GOPC	0	0	1	1
hsa-let-7e-5p	UTY	1	0	0	1
hsa-let-7e-5p	POTEG	0	1	1	2
hsa-let-7e-5p	CHRD	1	0	1	2
hsa-let-7e-5p	OTUB1	0	1	0	1
hsa-let-7e-5p	LRIG2	1	0	1	2
hsa-let-7e-5p	ZNF28	0	1	0	1
hsa-let-7e-5p	NDST1	0	1	0	1
hsa-let-7e-5p	CELF1	0	1	1	2
hsa-let-7e-5p	FBXO30	1	0	1	2
hsa-let-7e-5p	SLC30A7	0	0	1	1
hsa-let-7e-5p	ARL6IP6	0	0	1	1
hsa-let-7e-5p	CRCT1	1	0	1	2
hsa-let-7e-5p	ABCC10	0	0	1	1
hsa-let-7e-5p	KLHL36	0	0	1	1
hsa-let-7e-5p	PHACTR4	0	1	0	1
hsa-let-7e-5p	TTLL4	1	0	1	2
hsa-let-7e-5p	NSMCE2	0	0	1	1
hsa-let-7e-5p	ACVR2A	1	0	1	2
hsa-let-7e-5p	SNX1	0	0	1	1
hsa-let-7e-5p	GLRX	1	0	1	2
hsa-let-7e-5p	OPRL1	0	1	0	1
hsa-let-7e-5p	MYCL	0	0	1	1
hsa-let-7e-5p	PRDM2	1	0	0	1
hsa-let-7e-5p	CAPN3	1	0	1	2
hsa-let-7e-5p	KIAA1467	0	0	1	1
hsa-let-7e-5p	GABRB1	0	0	1	1
hsa-let-7e-5p	C16orf52	0	0	1	1
hsa-let-7e-5p	POLD1	0	1	0	1
hsa-let-7e-5p	MSN	1	0	1	2
hsa-let-7e-5p	GPATCH2	1	0	1	2
hsa-let-7e-5p	PA2G4	0	1	0	1
hsa-let-7e-5p	MGAT4A	1	0	1	2
hsa-let-7e-5p	OSMR	1	0	1	2
hsa-let-7e-5p	C8orf58	1	0	1	2
hsa-let-7e-5p	P2RX1	1	0	1	2
hsa-let-7e-5p	BIN3	1	0	1	2
hsa-let-7e-5p	GAREM	0	0	1	1
hsa-let-7e-5p	DDX19B	1	0	1	2
hsa-let-7e-5p	SUZ12	0	1	0	1
hsa-let-7e-5p	E2F2	1	0	1	2
hsa-let-7e-5p	KCTD15	0	0	1	1
hsa-let-7e-5p	SLC25A27	1	0	1	2
hsa-let-7e-5p	TMEM255A	0	0	1	1
hsa-let-7e-5p	NAPEPLD	0	0	1	1
hsa-let-7e-5p	BSN	1	0	1	2
hsa-let-7e-5p	SALL1	0	1	0	1
hsa-let-7e-5p	FAXC	1	0	1	2
hsa-let-7e-5p	VPS33A	1	0	0	1
hsa-let-7e-5p	ETNK1	1	0	1	2
hsa-let-7e-5p	STAT2	0	1	0	1
hsa-let-7e-5p	DZIP1	0	1	1	2
hsa-let-7e-5p	LCE2D	1	0	0	1
hsa-let-7e-5p	PLEKHH1	1	0	1	2
hsa-let-7e-5p	FAM180A	1	0	0	1
hsa-let-7e-5p	MACF1	0	1	0	1
hsa-let-7e-5p	COL3A1	1	0	1	2
hsa-let-7e-5p	IL22RA1	1	0	0	1
hsa-let-7e-5p	ABCB9	1	0	1	2
hsa-let-7e-5p	AC010441.1	0	0	1	1
hsa-let-7e-5p	ERP29	1	0	1	2
hsa-let-7e-5p	LMX1A	1	0	1	2
hsa-let-7e-5p	MGLL	1	0	1	2
hsa-let-7e-5p	CALU	1	1	1	3
hsa-let-7e-5p	PHKA1	0	1	0	1
hsa-let-7e-5p	CLP1	1	0	1	2
hsa-let-7e-5p	DNAJB14	0	0	1	1
hsa-let-7e-5p	UROC1	0	1	0	1
hsa-let-7e-5p	ZKSCAN7	0	1	0	1
hsa-let-7e-5p	EEA1	1	0	1	2
hsa-let-7e-5p	FAM43A	0	1	1	2
hsa-let-7e-5p	IGSF1	0	0	1	1
hsa-let-7e-5p	SH2B3	1	0	1	2
hsa-let-7e-5p	DDX26B	0	0	1	1
hsa-let-7e-5p	ZNF584	0	1	0	1
hsa-let-7e-5p	DIABLO	0	1	0	1
hsa-let-7e-5p	ARRDC4	1	0	1	2
hsa-let-7e-5p	NUP155	0	1	1	2
hsa-let-7e-5p	UHRF1BP1	0	1	0	1
hsa-let-7e-5p	B3GNT7	1	0	1	2
hsa-let-7e-5p	PPP1R12B	1	0	1	2
hsa-let-7e-5p	NIPA1	1	0	1	2
hsa-let-7e-5p	CTPS1	0	1	1	2
hsa-let-7e-5p	BSND	0	0	1	1
hsa-let-7e-5p	LUZP1	0	1	0	1
hsa-let-7e-5p	RMI2	1	0	0	1
hsa-let-7e-5p	OSBPL3	1	0	1	2
hsa-let-7e-5p	SLC30A6	0	0	1	1
hsa-let-7e-5p	STAG3	1	0	0	1
hsa-let-7e-5p	VSTM5	0	0	1	1
hsa-let-7e-5p	KCTD16	1	0	1	2
hsa-let-7e-5p	SYNJ2BP	0	1	1	2
hsa-let-7e-5p	SLC16A14	1	0	1	2
hsa-let-7e-5p	DHX57	1	1	1	3
hsa-let-7e-5p	SLC8A2	1	0	1	2
hsa-let-7e-5p	CCNT2	1	1	1	3
hsa-let-7e-5p	PPAPDC2	0	0	1	1
hsa-let-7e-5p	KPNA4	0	0	1	1
hsa-let-7e-5p	COL4A2	1	0	1	2
hsa-let-7e-5p	GJA9	0	0	1	1
hsa-let-7e-5p	GPR137	0	0	1	1
hsa-let-7e-5p	AGPAT9	0	0	1	1
hsa-let-7e-5p	MESDC1	0	0	1	1
hsa-let-7e-5p	GLUL	0	1	0	1
hsa-let-7e-5p	RIMS3	0	0	1	1
hsa-let-7e-5p	SLC6A5	0	0	1	1
hsa-let-7e-5p	CARNMT1	1	0	0	1
hsa-let-7e-5p	CHD9	0	1	1	2
hsa-let-7e-5p	CCNY	1	0	1	2
hsa-let-7e-5p	CEP135	1	1	1	3
hsa-let-7e-5p	FNIP1	1	0	1	2
hsa-let-7e-5p	RNF115	1	0	0	1
hsa-let-7e-5p	HAND1	1	1	1	3
hsa-let-7e-5p	GTPBP8	0	1	0	1
hsa-let-7e-5p	ISLR	0	0	1	1
hsa-let-7e-5p	PURB	0	0	1	1
hsa-let-7e-5p	GPIHBP1	1	0	0	1
hsa-let-7e-5p	ACTA1	1	1	0	2
hsa-let-7e-5p	COIL	1	1	1	3
hsa-let-7e-5p	TSPAN18	1	0	1	2
hsa-let-7e-5p	ZBP1	1	0	0	1
hsa-let-7e-5p	IGDCC3	1	0	1	2
hsa-let-7e-5p	ZNF512B	1	0	1	2
hsa-let-7e-5p	GAN	1	0	1	2
hsa-let-7e-5p	C14orf28	1	0	1	2
hsa-let-7e-5p	OSM	1	0	0	1
hsa-let-7e-5p	NAP1L1	1	1	1	3
hsa-let-7e-5p	TCF4	0	1	0	1
hsa-let-7e-5p	TRIM67	1	0	1	2
hsa-let-7e-5p	C1orf147	0	0	1	1
hsa-let-7e-5p	NSD1	1	1	1	3
hsa-let-7e-5p	C9orf41	0	0	1	1
hsa-let-7e-5p	ZNF516	1	0	1	2
hsa-let-7e-5p	RSPO2	1	0	1	2
hsa-let-7e-5p	TMEM26	0	0	1	1
hsa-let-7e-5p	MTUS1	1	1	1	3
hsa-let-7e-5p	FZD3	1	0	1	2
hsa-let-7e-5p	HBEGF	0	0	1	1
hsa-let-7e-5p	MSANTD3	0	0	1	1
hsa-let-7e-5p	KIAA1958	1	0	1	2
hsa-let-7e-5p	ADAM28	1	0	0	1
hsa-let-7e-5p	TUSC2	1	0	1	2
hsa-let-7e-5p	RUNX1T1	1	1	1	3
hsa-let-7e-5p	KCTD10	0	0	1	1
hsa-let-7e-5p	XYLT1	1	0	1	2
hsa-let-7e-5p	CLDN12	1	1	1	3
hsa-let-7e-5p	TMC7	1	0	1	2
hsa-let-7e-5p	GOLT1B	1	0	1	2
hsa-let-7e-5p	ANKFY1	1	0	1	2
hsa-let-7e-5p	MRPS2	0	1	0	1
hsa-let-7e-5p	TMEM2	1	0	1	2
hsa-let-7e-5p	MTFR1	0	1	0	1
hsa-let-7e-5p	FMNL3	0	1	0	1
hsa-let-7e-5p	ZNF8	0	1	0	1
hsa-let-7e-5p	NEDD4L	0	0	1	1
hsa-let-7e-5p	DPP6	1	0	0	1
hsa-let-7e-5p	SPRED3	0	0	1	1
hsa-let-7e-5p	PXDN	1	0	1	2
hsa-let-7e-5p	TP53	1	0	1	2
hsa-let-7e-5p	CNOT6	1	0	0	1
hsa-let-7e-5p	APBA1	1	0	1	2
hsa-let-7e-5p	WDR4	0	1	0	1
hsa-let-7e-5p	LOR	0	0	1	1
hsa-let-7e-5p	UBN2	0	1	1	2
hsa-let-7e-5p	ADIPOR2	1	1	1	3
hsa-let-7e-5p	RNF170	1	0	1	2
hsa-let-7e-5p	PM20D2	0	1	0	1
hsa-let-7e-5p	FAM122C	1	0	0	1
hsa-let-7e-5p	CNNM2	0	0	1	1
hsa-let-7e-5p	MBTD1	0	0	1	1
hsa-let-7e-5p	ACPP	0	0	1	1
hsa-let-7e-5p	B3GAT1	0	0	1	1
hsa-let-7e-5p	AMT	1	0	1	2
hsa-let-7e-5p	NT5DC2	0	1	0	1
hsa-let-7e-5p	OCLN	0	1	0	1
hsa-let-7e-5p	ADAMTS8	1	0	1	2
hsa-let-7e-5p	CUX1	1	0	0	1
hsa-let-7e-5p	B3GAT3	1	0	1	2
hsa-let-7e-5p	PCYOX1	0	0	1	1
hsa-let-7e-5p	PAWR	0	0	1	1
hsa-let-7e-5p	POLQ	1	0	0	1
hsa-let-7e-5p	SMIM13	1	0	1	2
hsa-let-7e-5p	TRMO	0	1	0	1
hsa-let-7e-5p	2020-03-09	1	0	1	2
hsa-let-7e-5p	CDC5L	0	1	0	1
hsa-let-7e-5p	INTS7	0	1	0	1
hsa-let-7e-5p	PGM2L1	1	1	1	3
hsa-let-7e-5p	JMJD1C	0	1	0	1
hsa-let-7e-5p	PFAS	0	1	0	1
hsa-let-7e-5p	THAP9	0	0	1	1
hsa-let-7e-5p	PLEKHG6	1	0	0	1
hsa-let-7e-5p	ZNF738	0	1	0	1
hsa-let-7e-5p	USE1	0	1	0	1
hsa-let-7e-5p	ULK2	0	0	1	1
hsa-let-7e-5p	ZC3H3	1	0	1	2
hsa-let-7e-5p	ZNF689	1	0	1	2
hsa-let-7e-5p	TOMM40L	0	1	0	1
hsa-let-7e-5p	ZNF432	1	0	0	1
hsa-let-7e-5p	COL15A1	0	0	1	1
hsa-let-7e-5p	ZNF473	0	0	1	1
hsa-let-7e-5p	GTF2I	1	1	1	3
hsa-let-7e-5p	MEIS3P1	0	1	0	1
hsa-let-7e-5p	CEBPD	0	0	1	1
hsa-let-7e-5p	GRIK2	0	0	1	1
hsa-let-7e-5p	XKR8	1	0	1	2
hsa-let-7e-5p	RPRD2	0	1	0	1
hsa-let-7e-5p	EIF5B	0	0	1	1
hsa-let-7e-5p	KRT78	1	0	0	1
hsa-let-7e-5p	HSPA14	1	0	0	1
hsa-let-7e-5p	COL27A1	1	0	1	2
hsa-let-7e-5p	XIAP	0	1	0	1
hsa-let-7e-5p	NNT	0	0	1	1
hsa-let-7e-5p	PPP1R2	0	1	0	1
hsa-let-7e-5p	CD59	1	1	0	2
hsa-let-7e-5p	DICER1	1	0	1	2
hsa-let-7e-5p	SPCS3	0	1	0	1
hsa-let-7e-5p	C6orf203	1	0	1	2
hsa-let-7e-5p	TGDS	1	0	1	2
hsa-let-7e-5p	FBXW2	0	1	0	1
hsa-let-7e-5p	ATP2B3	0	0	1	1
hsa-let-7e-5p	SLCO5A1	0	0	1	1
hsa-let-7e-5p	AKAP5	0	0	1	1
hsa-let-7e-5p	SPRYD7	1	0	0	1
hsa-let-7e-5p	TRIOBP	0	0	1	1
hsa-let-7e-5p	ANKRD33B	0	0	1	1
hsa-let-7e-5p	AURKB	1	1	0	2
hsa-let-7e-5p	UBE2V2	0	1	0	1
hsa-let-7e-5p	NRAS	1	0	1	2
hsa-let-7e-5p	COL4A6	1	0	1	2
hsa-let-7e-5p	KLHL13	1	0	1	2
hsa-let-7e-5p	FIGNL2	1	0	0	1
hsa-let-7e-5p	SYT11	1	0	1	2
hsa-let-7e-5p	ATL2	1	0	0	1
hsa-let-7e-5p	BMP5	0	0	1	1
hsa-let-7e-5p	KCMF1	0	0	1	1
hsa-let-7e-5p	TNFSF9	1	1	1	3
hsa-let-7e-5p	FAM120C	1	0	0	1
hsa-let-7e-5p	RBPJ	0	0	1	1
hsa-let-7e-5p	IL6	1	0	0	1
hsa-let-7e-5p	CERCAM	1	0	1	2
hsa-let-7e-5p	RABL2A	0	1	0	1
hsa-let-7e-5p	RPA1	0	1	0	1
hsa-let-7e-5p	SLC26A9	0	0	1	1
hsa-let-7e-5p	CDV3	1	1	1	3
hsa-let-7e-5p	CDC34	1	0	1	2
hsa-let-7e-5p	C17orf85	0	0	1	1
hsa-let-7e-5p	KCNC3	0	0	1	1
hsa-let-7e-5p	CHIC1	1	0	1	2
hsa-let-7e-5p	MAP3K2	1	0	1	2
hsa-let-7e-5p	STARD3NL	1	0	1	2
hsa-let-7e-5p	RNF217	1	0	1	2
hsa-let-7e-5p	TPP1	1	0	1	2
hsa-let-7e-5p	CBX5	1	1	1	3
hsa-let-7e-5p	CXorf36	0	0	1	1
hsa-let-7e-5p	NEFM	1	0	1	2
hsa-let-7e-5p	GNPTAB	1	0	1	2
hsa-let-7e-5p	RAG1	1	0	1	2
hsa-let-7e-5p	GDAP2	1	0	1	2
hsa-let-7e-5p	ZNF512	1	0	0	1
hsa-let-7e-5p	USP32	1	0	1	2
hsa-let-7e-5p	CLDN1	1	0	0	1
hsa-let-7e-5p	SLC20A1	1	1	1	3
hsa-let-7e-5p	DCBLD2	0	1	0	1
hsa-let-7e-5p	KIAA1244	0	0	1	1
hsa-let-7e-5p	MECP2	1	0	0	1
hsa-let-7e-5p	CSRNP3	1	0	1	2
hsa-let-7e-5p	POM121L12	1	0	0	1
hsa-let-7e-5p	C1orf210	0	1	0	1
hsa-let-7e-5p	FDPS	0	1	0	1
hsa-let-7e-5p	QARS	0	0	1	1
hsa-let-7e-5p	MIDN	0	1	0	1
hsa-let-7e-5p	CLDN16	1	0	0	1
hsa-let-7e-5p	RBM14	0	1	0	1
hsa-let-7e-5p	SMARCAD1	1	1	1	3
hsa-let-7e-5p	CREBBP	0	1	0	1
hsa-let-7e-5p	AKT2	0	0	1	1
hsa-let-7e-5p	SLC17A2	1	0	0	1
hsa-let-7e-5p	BRI3BP	0	1	0	1
hsa-let-7e-5p	SLC25A18	1	0	1	2
hsa-let-7e-5p	MS4A10	0	1	0	1
hsa-let-7e-5p	FADS3	0	0	1	1
hsa-let-7e-5p	DARS2	1	0	1	2
hsa-let-7e-5p	TNFRSF1B	1	0	1	2
hsa-let-7e-5p	NTN1	0	0	1	1
hsa-let-7e-5p	CADM2	1	0	1	2
hsa-let-7e-5p	DCUN1D3	1	0	1	2
hsa-let-7e-5p	FAM135A	1	0	1	2
hsa-let-7e-5p	AIFM1	1	0	1	2
hsa-let-7e-5p	KIF2A	0	0	1	1
hsa-let-7e-5p	PRAMEF13	0	1	0	1
hsa-let-7e-5p	CEP63	1	0	0	1
hsa-let-7e-5p	WDFY3	1	1	0	2
hsa-let-7e-5p	YY1	1	0	1	2
hsa-let-7e-5p	ST8SIA1	1	0	1	2
hsa-let-7e-5p	ANKRD40	0	1	0	1
hsa-let-7e-5p	ZNF318	1	0	0	1
hsa-let-7e-5p	ND4	0	1	0	1
hsa-let-7e-5p	GGA3	1	1	0	2
hsa-let-7e-5p	GALE	1	0	1	2
hsa-let-7e-5p	TRIM33	1	0	0	1
hsa-let-7e-5p	MUC4	1	0	0	1
hsa-let-7e-5p	CD86	0	0	1	1
hsa-let-7e-5p	L2HGDH	1	0	1	2
hsa-let-7e-5p	FIGN	1	1	1	3
hsa-let-7e-5p	KCNJ11	1	0	1	2
hsa-let-7e-5p	MLLT10	1	1	1	3
hsa-let-7e-5p	SPEG	1	0	1	2
hsa-let-7e-5p	PRRC2A	0	1	0	1
hsa-let-7e-5p	MMP11	1	0	1	2
hsa-let-7e-5p	MAP4K4	1	0	1	2
hsa-let-7e-5p	SNX6	1	0	1	2
hsa-let-7e-5p	CDKAL1	1	1	0	2
hsa-let-7e-5p	C19orf84	1	0	0	1
hsa-let-7e-5p	RAB22A	0	0	1	1
hsa-let-7e-5p	PCDH20	1	0	1	2
hsa-let-7e-5p	LONRF3	0	0	1	1
hsa-let-7e-5p	ELMSAN1	0	1	0	1
hsa-let-7e-5p	INPP5A	1	0	1	2
hsa-let-7e-5p	NCOR1	0	0	1	1
hsa-let-7e-5p	TMEM167A	1	0	1	2
hsa-let-7e-5p	COX3	0	1	0	1
hsa-let-7e-5p	SMIM3	1	0	1	2
hsa-let-7e-5p	FBXO32	1	0	1	2
hsa-let-7e-5p	ESRP2	1	0	0	1
hsa-let-7e-5p	GNG5	1	1	1	3
hsa-let-7e-5p	ADRB3	1	0	1	2
hsa-let-7e-5p	HIC2	1	0	1	2
hsa-let-7e-5p	ICOS	1	0	1	2
hsa-let-7e-5p	ZBTB5	1	1	1	3
hsa-let-7e-5p	PAPD4	0	1	0	1
hsa-let-7e-5p	PLEKHO1	1	1	1	3
hsa-let-7e-5p	CABLES1	0	1	0	1
hsa-let-7e-5p	LYN	0	1	0	1
hsa-let-7e-5p	AC068987.1	0	0	1	1
hsa-let-7e-5p	PACS2	1	1	1	3
hsa-let-7e-5p	OLR1	1	0	1	2
hsa-let-7e-5p	RNF26	0	1	0	1
hsa-let-7e-5p	AGO1	1	1	1	3
hsa-let-7e-5p	ARL8B	0	1	0	1
hsa-let-7e-5p	QSOX1	0	1	0	1
hsa-let-7e-5p	MFAP3L	0	0	1	1
hsa-let-7e-5p	TUBA1B	0	1	0	1
hsa-let-7e-5p	GPCPD1	1	0	1	2
hsa-let-7e-5p	SULF2	1	0	1	2
hsa-let-7e-5p	ESR2	1	0	0	1
hsa-let-7e-5p	SKIV2L	0	1	0	1
hsa-let-7e-5p	DCX	0	0	1	1
hsa-let-7e-5p	PGRMC1	1	1	1	3
hsa-let-7e-5p	STAB2	0	0	1	1
hsa-let-7e-5p	ITSN1	0	0	1	1
hsa-let-7e-5p	ARHGEF38	1	0	1	2
hsa-let-7e-5p	BRD3	1	0	0	1
hsa-let-7e-5p	BCAT1	1	0	1	2
hsa-let-7e-5p	ATP2B4	1	0	1	2
hsa-let-7e-5p	AK4	0	1	0	1
hsa-let-7e-5p	FAM222B	0	1	1	2
hsa-let-7e-5p	SLC11A2	0	1	0	1
hsa-let-7e-5p	ST3GAL1	0	0	1	1
hsa-let-7e-5p	NOL4L	1	0	0	1
hsa-let-7e-5p	DNAJC28	0	1	0	1
hsa-let-7e-5p	HIPK1	0	1	0	1
hsa-let-7e-5p	PAG1	1	0	1	2
hsa-let-7e-5p	IGLON5	0	0	1	1
hsa-let-7e-5p	ARHGEF7	0	0	1	1
hsa-let-7e-5p	CCL3	0	0	1	1
hsa-let-7e-5p	RCOR3	0	1	0	1
hsa-let-7e-5p	NAA30	1	1	1	3
hsa-let-7e-5p	ARHGAP12	1	0	0	1
hsa-let-7e-5p	MEX3A	1	0	1	2
hsa-let-7e-5p	BTBD9	1	0	1	2
hsa-let-7e-5p	ADAMTS6	1	0	0	1
hsa-let-7e-5p	INTS6L	1	0	0	1
hsa-let-7e-5p	MBD2	1	1	1	3
hsa-let-7e-5p	HECTD2	1	0	1	2
hsa-let-7e-5p	SCN5A	1	0	1	2
hsa-let-7e-5p	PDHB	0	0	1	1
hsa-let-7e-5p	RNF20	1	0	1	2
hsa-let-7e-5p	BRI3	0	1	0	1
hsa-let-7e-5p	CALM1	0	0	1	1
hsa-let-7e-5p	CCNJL	0	0	1	1
hsa-let-7e-5p	MEF2D	0	1	1	2
hsa-let-7e-5p	ZFP62	0	1	0	1
hsa-let-7e-5p	KIAA1549	1	0	1	2
hsa-let-7e-5p	RGMA	0	0	1	1
hsa-let-7e-5p	IL6R	0	1	1	2
hsa-let-7e-5p	ANGPTL2	0	0	1	1
hsa-let-7e-5p	DDX31	1	0	0	1
hsa-let-7e-5p	ZCCHC11	1	0	1	2
hsa-let-7e-5p	CTSA	0	1	0	1
hsa-let-7e-5p	GK5	0	0	1	1
hsa-let-7e-5p	GEMIN7	0	0	1	1
hsa-let-7e-5p	PLEKHG7	1	0	1	2
hsa-let-7e-5p	DYRK1A	1	0	1	2
hsa-let-7e-5p	ZNF774	0	1	1	2
hsa-let-7e-5p	TRHDE	1	0	1	2
hsa-let-7e-5p	COL4A5	0	0	1	1
hsa-let-7e-5p	ZNF282	0	0	1	1
hsa-let-7e-5p	NPHP3	1	0	0	1
hsa-let-7e-5p	PKD1L2	1	0	0	1
hsa-let-7e-5p	SCRT2	0	0	1	1
hsa-let-7e-5p	CCND1	1	1	1	3
hsa-let-7e-5p	SECISBP2L	1	0	1	2
hsa-let-7e-5p	CHRFAM7A	0	0	1	1
hsa-let-7e-5p	ELOVL4	1	0	1	2
hsa-let-7e-5p	UGCG	1	0	1	2
hsa-let-7e-5p	TMED5	1	1	1	3
hsa-let-7e-5p	CPA4	1	1	1	3
hsa-let-7e-5p	BCAP29	1	0	1	2
hsa-let-7e-5p	SCYL3	1	0	1	2
hsa-let-7e-5p	VGLL3	1	0	1	2
hsa-let-7e-5p	ZNF280B	1	0	1	2
hsa-let-7e-5p	GTF3C1	0	1	0	1
hsa-let-7e-5p	FAM160B1	0	1	0	1
hsa-let-7e-5p	BCL2L1	1	0	1	2
hsa-let-7e-5p	SREBF1	0	1	0	1
hsa-let-7e-5p	BMP2K	0	1	0	1
hsa-let-7e-5p	C18orf21	1	0	0	1
hsa-let-7e-5p	C15orf39	1	0	1	2
hsa-let-7e-5p	GOLGA4	1	1	1	3
hsa-let-7e-5p	PES1	0	1	0	1
hsa-let-7e-5p	MAP4K3	1	0	1	2
hsa-let-7e-5p	ZBTB8B	1	0	1	2
hsa-let-7e-5p	ZNF236	0	1	0	1
hsa-let-7e-5p	EIF3J	0	1	0	1
hsa-let-7e-5p	MIOS	0	0	1	1
hsa-let-7e-5p	MAGEA3	0	1	0	1
hsa-let-7e-5p	SOX6	1	0	1	2
hsa-let-7e-5p	EEF2K	1	0	1	2
hsa-let-7e-5p	NTRK3	1	0	0	1
hsa-let-7e-5p	CRBN	0	0	1	1
hsa-let-7e-5p	ZNF578	0	1	0	1
hsa-let-7e-5p	PPARGC1B	1	0	1	2
hsa-let-7e-5p	ESPL1	1	1	1	3
hsa-let-7e-5p	NCLN	0	1	0	1
hsa-let-7e-5p	LSR	0	1	0	1
hsa-let-7e-5p	UTP15	0	1	1	2
hsa-let-7e-5p	SOCS7	1	1	1	3
hsa-let-7e-5p	GPR156	1	0	1	2
hsa-let-7e-5p	COL14A1	1	0	1	2
hsa-let-7e-5p	LIMD1	1	0	1	2
hsa-let-7e-5p	RPN2	0	1	0	1
hsa-let-7e-5p	DTNB	0	1	0	1
hsa-let-7e-5p	SCUBE3	0	0	1	1
hsa-let-7e-5p	ATXN1L	0	0	1	1
hsa-let-7e-5p	PLPP5	1	0	0	1
hsa-let-7e-5p	SLC6A1	0	0	1	1
hsa-let-7e-5p	KLHL31	1	0	1	2
hsa-let-7e-5p	KCNC1	1	0	1	2
hsa-let-7e-5p	AGBL2	1	0	0	1
hsa-let-7e-5p	FRMD5	1	0	1	2
hsa-let-7e-5p	LBH	1	0	1	2
hsa-let-7e-5p	PBX1	1	0	1	2
hsa-let-7e-5p	ACVR2B	0	0	1	1
hsa-let-7e-5p	KCNV1	0	0	1	1
hsa-let-7e-5p	SCARA3	0	0	1	1
hsa-let-7e-5p	ADAMTS1	0	0	1	1
hsa-let-7e-5p	DAPK1	1	0	1	2
hsa-let-7e-5p	ACOT9	0	1	0	1
hsa-let-7e-5p	USP44	1	0	1	2
hsa-let-7e-5p	SCN11A	1	0	1	2
hsa-let-7e-5p	APH1A	1	0	0	1
hsa-let-7e-5p	NKD1	1	0	1	2
hsa-let-7e-5p	SDK1	1	0	1	2
hsa-let-7e-5p	TMEM41A	1	0	1	2
hsa-let-7e-5p	FREM2	1	0	1	2
hsa-let-7e-5p	PRR5-ARHGAP8	0	1	0	1
hsa-let-7e-5p	PPTC7	0	0	1	1
hsa-let-7e-5p	PLXND1	1	1	1	3
hsa-let-7e-5p	DDX19A	1	0	1	2
hsa-let-7e-5p	CCL3L3	0	0	1	1
hsa-let-7e-5p	SUV39H2	0	0	1	1
hsa-let-7e-5p	STX3	1	1	1	3
hsa-let-7e-5p	ZNF215	1	0	0	1
hsa-let-7e-5p	DCUN1D2	1	0	1	2
hsa-let-7e-5p	VAMP2	0	1	0	1
hsa-let-7e-5p	RAB8B	1	0	1	2
hsa-let-7e-5p	GAREM1	1	0	0	1
hsa-let-7e-5p	SLCO4A1	0	1	0	1
hsa-let-7e-5p	LZIC	0	0	1	1
hsa-let-7e-5p	KIAA0895L	0	0	1	1
hsa-let-7e-5p	RFX6	1	0	1	2
hsa-let-7e-5p	SLC2A12	1	0	1	2
hsa-let-7e-5p	DCAF6	0	1	0	1
hsa-let-7e-5p	SLC12A4	0	1	0	1
hsa-let-7e-5p	SLC35D2	1	0	1	2
hsa-let-7e-5p	ZBTB39	1	0	1	2
hsa-let-7e-5p	CCL3L1	0	0	1	1
hsa-let-7e-5p	AGMAT	0	1	0	1
hsa-let-7e-5p	TIA1	0	0	1	1
hsa-let-7e-5p	SREBF2	1	0	1	2
hsa-let-7e-5p	CPEB2	1	0	1	2
hsa-let-7e-5p	DYRK2	1	1	1	3
hsa-let-7e-5p	ZNF879	0	0	1	1
hsa-let-7e-5p	STARD9	1	0	1	2
hsa-let-7e-5p	GABPA	1	0	1	2
hsa-let-7e-5p	EDA	0	0	1	1
hsa-let-7e-5p	C19orf48	0	1	0	1
hsa-let-7e-5p	RIOK3	0	0	1	1
hsa-let-7e-5p	PRPF38B	1	0	1	2
hsa-let-7e-5p	EPB41	1	0	0	1
hsa-let-7e-5p	RAB11FIP4	1	1	1	3
hsa-let-7e-5p	CLOCK	1	0	1	2
hsa-let-7e-5p	FAM96A	1	0	0	1
hsa-let-7e-5p	XKRX	0	0	1	1
hsa-let-7e-5p	C12orf49	0	1	0	1
hsa-let-7e-5p	PPP1R16B	1	0	1	2
hsa-let-7e-5p	POU6F2	0	0	1	1
hsa-let-7e-5p	RBM38	1	0	1	2
hsa-let-7e-5p	C3orf52	0	0	1	1
hsa-let-7e-5p	PARM1	1	0	1	2
hsa-let-7e-5p	KIAA1328	0	1	0	1
hsa-let-7e-5p	HMGA2	1	1	1	3
hsa-let-7e-5p	UBAP2L	0	1	0	1
hsa-let-7e-5p	HNRNPC	0	1	0	1
hsa-let-7e-5p	ZNF641	1	0	1	2
hsa-let-7e-5p	GOLGA6L9	1	0	0	1
hsa-let-7e-5p	C20orf194	1	0	1	2
hsa-let-7e-5p	YTHDF3	1	0	1	2
hsa-let-7e-5p	PRKAB2	0	0	1	1
hsa-let-7e-5p	NUMBL	0	0	1	1
hsa-let-7e-5p	LTN1	1	0	1	2
hsa-let-7e-5p	SFMBT1	1	0	1	2
hsa-let-7e-5p	PDGFB	1	1	1	3
hsa-let-7e-5p	HELZ	1	0	1	2
hsa-let-7e-5p	ARHGEF15	1	0	1	2
hsa-let-7e-5p	FMO4	1	1	0	2
hsa-let-7e-5p	TMEM65	1	0	1	2
hsa-let-7e-5p	TSPEAR	1	0	1	2
hsa-let-7e-5p	GPC4	0	0	1	1
hsa-let-7e-5p	C19orf47	1	1	1	3
hsa-let-7e-5p	CPEB4	0	0	1	1
hsa-let-7e-5p	SYT7	1	0	1	2
hsa-let-7e-5p	KATNAL1	1	1	1	3
hsa-let-7e-5p	SEMA4C	1	1	1	3
hsa-let-7e-5p	KCNK6	0	0	1	1
hsa-let-7e-5p	NDUFA4P1	0	1	0	1
hsa-let-7e-5p	ATP6V1C1	1	0	1	2
hsa-let-7e-5p	STARD13	1	0	1	2
hsa-let-7e-5p	LDB1	1	0	1	2
hsa-let-7e-5p	BLOC1S6	0	0	1	1
hsa-let-7e-5p	DLGAP4	1	0	1	2
hsa-let-7e-5p	NOCT	0	1	0	1
hsa-let-7e-5p	GRAMD3	1	0	0	1
hsa-let-7e-5p	DUSP22	1	0	1	2
hsa-let-7e-5p	EIF4G2	1	1	1	3
hsa-let-7e-5p	RASL10B	0	0	1	1
hsa-let-7e-5p	ZNF197	1	0	0	1
hsa-let-7e-5p	RANBP2	1	1	1	3
hsa-let-7e-5p	RFC2	0	1	0	1
hsa-let-7e-5p	PMPCA	0	1	0	1
hsa-let-7e-5p	E2F5	1	0	1	2
hsa-let-7e-5p	IGF1R	1	1	1	3
hsa-let-7e-5p	PKN2	1	0	1	2
hsa-let-7e-5p	THYN1	0	1	0	1
hsa-let-7e-5p	MED6	1	0	1	2
hsa-let-7e-5p	MEGF11	0	0	1	1
hsa-let-7e-5p	PAX3	1	1	1	3
hsa-let-7e-5p	RAB15	1	0	1	2
hsa-let-7e-5p	HSPE1-MOB4	1	0	1	2
hsa-let-7e-5p	CEP85L	0	0	1	1
hsa-let-7e-5p	CLTC	0	1	0	1
hsa-let-7e-5p	IPO11	0	0	1	1
hsa-let-7e-5p	TRPM6	1	0	1	2
hsa-let-7e-5p	PANX2	1	0	1	2
hsa-let-7e-5p	RACGAP1	0	1	0	1
hsa-let-7e-5p	ZC3H10	0	0	1	1
hsa-let-7e-5p	CNOT2	0	0	1	1
hsa-let-7e-5p	CHRNA7	0	0	1	1
hsa-let-7e-5p	HECTD4	0	0	1	1
hsa-let-7e-5p	HNRNPA1	0	0	1	1
hsa-let-7e-5p	NYNRIN	1	0	1	2
hsa-let-7e-5p	ADAMTS15	1	0	1	2
hsa-let-7e-5p	RGS16	1	0	1	2
hsa-let-7e-5p	PDPR	1	0	1	2
hsa-let-7e-5p	GIPC1	1	0	1	2
hsa-let-7e-5p	LRRC59	0	0	1	1
hsa-let-7e-5p	JAZF1	0	1	0	1
hsa-let-7e-5p	VANGL2	0	0	1	1
hsa-let-7e-5p	TRABD	1	0	1	2
hsa-let-7e-5p	EXOC5	0	0	1	1
hsa-let-7e-5p	ZNF284	0	1	0	1
hsa-let-7e-5p	PIGS	0	1	0	1
hsa-let-7e-5p	ATG9A	0	1	0	1
hsa-let-7e-5p	NLRP2B	1	0	0	1
hsa-let-7e-5p	PLCB4	1	0	0	1
hsa-let-7e-5p	EIF2B2	0	0	1	1
hsa-let-7e-5p	INO80D	0	0	1	1
hsa-let-7e-5p	FAM103A1	1	0	1	2
hsa-let-7e-5p	PAK1	0	0	1	1
hsa-let-7e-5p	PAPPA	1	0	1	2
hsa-let-7e-5p	ZNF652	1	1	1	3
hsa-let-7e-5p	PRTG	1	0	0	1
hsa-let-7e-5p	IL10	1	0	1	2
hsa-let-7e-5p	KIAA0355	0	1	0	1
hsa-let-7e-5p	RCC1L	0	1	0	1
hsa-let-7e-5p	DHX15	0	1	0	1
hsa-let-7e-5p	BEGAIN	1	0	1	2
hsa-let-7e-5p	ARL5A	1	0	1	2
hsa-let-7e-5p	MARS2	1	1	1	3
hsa-let-7e-5p	PDLIM7	1	0	0	1
hsa-let-7e-5p	MCF2L2	0	1	0	1
hsa-let-7e-5p	CCDC144A	0	0	1	1
hsa-let-7e-5p	SMAP2	0	1	0	1
hsa-let-7e-5p	ND2	0	1	0	1
hsa-let-7e-5p	RCN1	1	0	1	2
hsa-let-7e-5p	MPL	0	1	0	1
hsa-let-7e-5p	ADRB1	1	0	1	2
hsa-let-7e-5p	POLR2D	1	1	1	3
hsa-let-7e-5p	CPED1	1	0	1	2
hsa-let-7e-5p	HASPIN	0	1	0	1
hsa-let-7e-5p	CYP46A1	0	0	1	1
hsa-let-7e-5p	TRIM71	1	1	1	3
hsa-let-7e-5p	SAP30L	0	0	1	1
hsa-let-7e-5p	C5orf51	1	1	1	3
hsa-let-7e-5p	DNA2	1	1	1	3
hsa-let-7e-5p	FPR1	0	1	0	1
hsa-let-7e-5p	PSME4	0	1	0	1
hsa-let-7e-5p	LRTOMT	1	0	0	1
hsa-let-7e-5p	TBKBP1	1	0	1	2
hsa-let-7e-5p	EN2	0	1	0	1
hsa-let-7e-5p	DGCR8	0	1	0	1
hsa-let-7e-5p	ACAP3	0	0	1	1
hsa-let-7e-5p	RBBP4	0	1	0	1
hsa-let-7e-5p	COLEC12	0	1	0	1
hsa-let-7e-5p	NME4	1	1	1	3
hsa-let-7e-5p	RP11-480I12.4	0	0	1	1
hsa-let-7e-5p	SIGLEC5	1	0	0	1
hsa-let-7e-5p	ZBTB26	0	0	1	1
hsa-let-7e-5p	TSC1	1	0	1	2
hsa-let-7e-5p	SCYL1	0	1	0	1
hsa-let-7e-5p	VCL	0	1	0	1
hsa-let-7e-5p	ND1	0	1	0	1
hsa-let-7e-5p	YOD1	1	1	1	3
hsa-let-7e-5p	PEG10	1	1	1	3
hsa-let-7e-5p	NKIRAS2	1	0	1	2
hsa-let-7e-5p	RPLP2	0	1	0	1
hsa-let-7e-5p	POLL	1	1	0	2
hsa-let-7e-5p	GPAT3	1	0	0	1
hsa-let-7e-5p	ZNF275	1	0	1	2
hsa-let-7e-5p	RGPD5	1	0	0	1
hsa-let-7e-5p	PSENEN	0	0	1	1
hsa-let-7e-5p	HABP4	1	0	1	2
hsa-let-7e-5p	AHR	0	1	0	1
hsa-let-7e-5p	GRIN3A	1	0	1	2
hsa-let-7e-5p	ZNF644	1	1	1	3
hsa-let-7e-5p	RIMKLA	0	0	1	1
hsa-let-7e-5p	LAMP2	1	0	0	1
hsa-let-7e-5p	C19orf26	0	0	1	1
hsa-let-7e-5p	RNF44	1	1	1	3
hsa-let-7e-5p	STX17	1	0	1	2
hsa-let-7e-5p	EMILIN2	0	1	0	1
hsa-let-7e-5p	IKZF2	1	0	1	2
hsa-let-7e-5p	THEM6	0	1	0	1
hsa-let-7e-5p	GREB1	0	0	1	1
hsa-let-7e-5p	NID2	1	0	1	2
hsa-let-7e-5p	FNDC9	0	1	0	1
hsa-let-7e-5p	MKI67	0	1	0	1
hsa-let-7e-5p	GMPS	0	1	0	1
hsa-let-7e-5p	RRM1	0	1	0	1
hsa-let-7e-5p	MAP3K1	1	0	1	2
hsa-let-7e-5p	TRIB2	1	0	1	2
hsa-let-7e-5p	SIGLEC14	1	0	0	1
hsa-let-7e-5p	TMED4	1	1	0	2
hsa-let-7e-5p	ABHD17C	1	1	1	3
hsa-let-7e-5p	FAM208A	0	0	1	1
hsa-let-7e-5p	SOCS1	1	1	1	3
hsa-let-7e-5p	HOXD1	1	0	1	2
hsa-let-7e-5p	PCDH19	1	0	1	2
hsa-let-7e-5p	SRD5A3	1	0	1	2
hsa-let-7e-5p	ZNF311	1	0	0	1
hsa-let-7e-5p	TFR2	0	0	1	1
hsa-let-7e-5p	CCL7	1	0	1	2
hsa-let-7e-5p	NOA1	0	1	0	1
hsa-let-7e-5p	NCBP1	0	1	0	1
hsa-let-7e-5p	ERO1A	1	1	0	2
hsa-let-7e-5p	CYP2B6	0	1	0	1
hsa-let-7e-5p	ABHD18	1	0	0	1
hsa-let-7e-5p	KMT2D	1	1	1	3
hsa-let-7e-5p	MAP3K3	1	0	1	2
hsa-let-7e-5p	AHCYL2	0	1	0	1
hsa-let-7e-5p	SSH1	1	0	1	2
hsa-let-7e-5p	ARHGAP20	0	0	1	1
hsa-let-7e-5p	ALDH6A1	0	0	1	1
hsa-let-7e-5p	POGZ	1	0	1	2
hsa-let-7e-5p	NOM1	0	1	0	1
hsa-let-7e-5p	SEMA3F	1	0	0	1
hsa-let-7e-5p	SLF2	1	0	0	1
hsa-let-7e-5p	PSMD2	0	1	0	1
hsa-let-7e-5p	RNF7	0	0	1	1
hsa-let-7e-5p	CASP5	0	0	1	1
hsa-let-7e-5p	PRDM5	1	0	1	2
hsa-let-7e-5p	SWT1	0	0	1	1
hsa-let-7e-5p	RAD18	0	1	0	1
hsa-let-7e-5p	HERPUD1	0	1	0	1
hsa-let-7e-5p	TARBP2	0	0	1	1
hsa-let-7e-5p	ATG4B	0	0	1	1
hsa-let-7e-5p	PLEKHA8	1	0	1	2
hsa-let-7e-5p	TOR1AIP2	0	0	1	1
hsa-let-7e-5p	ACSL6	1	0	1	2
hsa-let-7e-5p	SAMD12	1	0	1	2
hsa-let-7e-5p	FRS2	1	0	1	2
hsa-let-7e-5p	SAR1A	0	1	0	1
hsa-let-7e-5p	SLC19A3	0	1	0	1
hsa-let-7e-5p	SLC5A9	1	0	1	2
hsa-let-7e-5p	STARD7	0	1	0	1
hsa-let-7e-5p	CBL	0	0	1	1
hsa-let-7e-5p	BAHCC1	0	1	0	1
hsa-let-7e-5p	PIGN	0	1	0	1
hsa-let-7e-5p	PPIG	0	1	0	1
hsa-let-7e-5p	SH3RF3	1	0	1	2
hsa-let-7e-5p	ZNF783	0	0	1	1
hsa-let-7e-5p	CBX2	1	0	1	2
hsa-let-7e-5p	GPATCH3	1	0	1	2
hsa-let-7e-5p	PTAR1	0	0	1	1
hsa-let-7e-5p	RTL9	1	0	0	1
hsa-let-7e-5p	GDF6	1	0	1	2
hsa-let-7e-5p	UGGT1	1	1	1	3
hsa-let-7e-5p	STYX	0	0	1	1
hsa-let-7e-5p	FOXP1	0	0	1	1
hsa-let-7e-5p	SLC16A10	0	0	1	1
hsa-let-7e-5p	MED8	1	0	1	2
hsa-let-7e-5p	SLC30A1	0	0	1	1
hsa-let-7e-5p	PLPP6	1	0	0	1
hsa-let-7e-5p	WNT1	0	1	1	2
hsa-let-7e-5p	BMP2	0	0	1	1
hsa-let-7e-5p	CCDC93	0	0	1	1
hsa-let-7e-5p	ZBTB37	0	1	1	2
hsa-let-7e-5p	ZNF391	0	0	1	1
hsa-let-7e-5p	PPP1R10	0	1	0	1
hsa-let-7e-5p	AMD1	0	1	0	1
hsa-let-7e-5p	TIMP3	0	1	0	1
hsa-let-7e-5p	WNK3	1	0	1	2
hsa-let-7e-5p	PTPRD	1	0	1	2
hsa-let-7e-5p	IFNLR1	1	1	0	2
hsa-let-7e-5p	BZW2	1	0	1	2
hsa-let-7e-5p	BTF3L4	0	0	1	1
hsa-let-7e-5p	TRPV1	0	1	0	1
hsa-let-7e-5p	SLC2A11	0	1	0	1
hsa-let-7e-5p	SALL3	1	1	1	3
hsa-let-7e-5p	ACVR1C	1	0	1	2
hsa-let-7e-5p	CASKIN1	1	0	1	2
hsa-let-7e-5p	ZNF10	1	0	1	2
hsa-let-7e-5p	ZNF770	0	1	0	1
hsa-let-7e-5p	RUFY3	1	0	1	2
hsa-let-7e-5p	RASL10A	0	0	1	1
hsa-let-7e-5p	SYT2	1	0	1	2
hsa-let-7e-5p	LMLN	1	1	1	3
hsa-let-7e-5p	ZNF697	1	0	1	2
hsa-let-7e-5p	CWC15	0	1	0	1
hsa-let-7e-5p	HCFC2	0	0	1	1
hsa-let-7e-5p	BTBD3	1	0	1	2
hsa-let-7e-5p	CCNG1	0	1	0	1
hsa-let-7e-5p	GATB	0	1	0	1
hsa-let-7e-5p	TMTC3	0	1	1	2
hsa-let-7e-5p	USP24	1	0	1	2
hsa-let-7e-5p	MAPK8	1	0	1	2
hsa-let-7e-5p	PUDP	1	0	0	1
hsa-let-7e-5p	MTCH2	0	1	0	1
hsa-let-7e-5p	TXLNG	1	1	1	3
hsa-let-7e-5p	BTG2	1	0	1	2
hsa-let-7e-5p	RABL2B	0	1	0	1
hsa-let-7e-5p	PDXDC1	1	0	0	1
hsa-let-7e-5p	B4GAT1	1	0	0	1
hsa-let-7e-5p	FAS	0	0	1	1
hsa-let-7e-5p	DMD	1	0	1	2
hsa-let-7e-5p	S100A8	0	0	1	1
hsa-let-7e-5p	SLC52A3	1	0	1	2
hsa-let-7e-5p	B3GALT1	0	0	1	1
hsa-let-7e-5p	KIAA2022	1	0	1	2
hsa-let-7e-5p	MFSD4	0	0	1	1
hsa-let-7e-5p	POC1B-GALNT4	1	0	1	2
hsa-let-7e-5p	FAM118A	1	0	1	2
hsa-let-7e-5p	COL4A1	1	0	1	2
hsa-let-7e-5p	RHBDD2	0	1	0	1
hsa-let-7e-5p	SPATA2	1	0	1	2
hsa-let-7e-5p	ETV3	0	0	1	1
hsa-let-7e-5p	GRAMD1B	1	0	1	2
hsa-let-7e-5p	SEC14L1	1	0	1	2
hsa-let-7e-5p	CALN1	0	0	1	1
hsa-let-7e-5p	PPP3CA	1	0	1	2
hsa-let-7e-5p	OTUD5	0	1	0	1
hsa-let-7e-5p	HAS2	1	0	1	2
hsa-let-7e-5p	CHTOP	0	1	0	1
hsa-let-7e-5p	FAM178A	0	0	1	1
hsa-let-7e-5p	DSP	0	1	0	1
hsa-let-7e-5p	MRPL12	0	1	0	1
hsa-let-7e-5p	MGA	1	0	1	2
hsa-let-7e-5p	ZCCHC9	1	0	0	1
hsa-let-7e-5p	PXT1	1	0	1	2
hsa-let-7e-5p	CBFA2T3	1	0	1	2
hsa-let-7e-5p	TBX5	1	0	1	2
hsa-let-7e-5p	APBB3	1	0	1	2
hsa-let-7e-5p	MLXIP	0	0	1	1
hsa-let-7e-5p	TMOD2	1	0	1	2
hsa-let-7e-5p	RAI2	0	1	0	1
hsa-let-7e-5p	MSI2	1	1	1	3
hsa-let-7e-5p	MED13L	0	1	0	1
hsa-let-7e-5p	PARPBP	1	0	0	1
hsa-let-7e-5p	HOOK1	1	0	1	2
hsa-let-7e-5p	CLCN5	1	0	1	2
hsa-let-7e-5p	LRRC10B	0	0	1	1
hsa-let-7e-5p	GJB4	1	0	0	1
hsa-let-7e-5p	HK2	1	0	1	2
hsa-let-7e-5p	FAM189A1	1	0	1	2
hsa-let-7e-5p	ZNF784	1	0	1	2
hsa-let-7e-5p	CDYL	0	0	1	1
hsa-let-7e-5p	SP8	1	0	1	2
hsa-let-7e-5p	ZNF710	1	0	1	2
hsa-let-7e-5p	ZNF792	1	0	0	1
hsa-let-7e-5p	KPNA5	0	1	1	2
hsa-let-7e-5p	MED28	1	0	1	2
hsa-let-7e-5p	GOLGA6L4	1	0	0	1
hsa-let-7e-5p	UFM1	0	0	1	1
hsa-let-7e-5p	RRAD	0	1	0	1
hsa-let-7e-5p	DUSP4	0	0	1	1
hsa-let-7e-5p	ATP6V1G1	1	1	0	2
hsa-let-7e-5p	CLASP2	1	0	1	2
hsa-let-7e-5p	GPM6B	0	1	0	1
hsa-let-7e-5p	MAGEA6	0	1	0	1
hsa-let-7e-5p	INTU	0	0	1	1
hsa-let-7e-5p	TMEM234	1	0	1	2
hsa-let-7e-5p	APPL1	0	1	0	1
hsa-let-7e-5p	RASGRP1	1	0	1	2
hsa-let-7e-5p	ACER2	1	1	1	3
hsa-let-7e-5p	HLF	0	0	1	1
hsa-let-7e-5p	MSANTD2	1	0	0	1
hsa-let-7e-5p	DPYSL3	0	0	1	1
hsa-let-7e-5p	SLC6A15	0	0	1	1
hsa-let-7e-5p	CTIF	0	0	1	1
hsa-let-7e-5p	SLC1A4	1	0	1	2
hsa-let-7e-5p	RGAG1	0	0	1	1
hsa-let-7e-5p	SUB1	1	1	1	3
hsa-let-7e-5p	PRPF8	0	1	0	1
hsa-let-7e-5p	FZD4	1	0	1	2
hsa-let-7e-5p	ATXN7L3B	0	1	1	2
hsa-let-7e-5p	CRK	1	1	1	3
hsa-let-7e-5p	TNFRSF10B	0	1	0	1
hsa-let-7e-5p	EPHA4	1	1	1	3
hsa-let-7e-5p	DLC1	1	0	1	2
hsa-let-7e-5p	AEBP2	0	1	0	1
hsa-let-7e-5p	CYP19A1	0	0	1	1
hsa-let-7e-5p	ZNF805	0	1	0	1
hsa-let-7e-5p	NAA20	0	1	1	2
hsa-let-7e-5p	COL5A2	1	0	1	2
hsa-let-7e-5p	TMEM143	1	0	1	2
hsa-let-7e-5p	PHF8	0	0	1	1
hsa-let-7e-5p	MEIS2	1	0	1	2
hsa-let-7e-5p	LGR4	0	0	1	1
hsa-let-7e-5p	TMEM194A	0	0	1	1
hsa-let-7e-5p	C20orf112	0	0	1	1
hsa-let-7e-5p	TMEM178B	1	0	1	2
hsa-let-7e-5p	CMTM6	0	0	1	1
hsa-let-7e-5p	TIMM50	0	1	0	1
hsa-let-7e-5p	SOST	0	0	1	1
hsa-let-7e-5p	TIMM17B	0	0	1	1
hsa-let-7e-5p	PLEKHA3	0	1	1	2
hsa-let-7e-5p	FAM219B	0	1	0	1
hsa-let-7e-5p	APPBP2	0	0	1	1
hsa-let-7e-5p	CXCL8	0	1	0	1
hsa-let-7e-5p	NGF	1	0	1	2
hsa-let-7e-5p	AGAP1	1	0	1	2
hsa-let-7e-5p	FAM84B	0	0	1	1
hsa-let-7e-5p	PARD6B	1	0	1	2
hsa-let-7e-5p	DPH3	1	0	1	2
hsa-let-7e-5p	RGPD6	1	0	0	1
hsa-let-7e-5p	FOXD4L6	0	1	0	1
hsa-let-7e-5p	PCTP	0	0	1	1
hsa-let-7e-5p	GLO1	0	1	0	1
hsa-let-7e-5p	TSEN34	1	0	0	1
hsa-let-7e-5p	TXNRD1	0	1	0	1
hsa-let-7e-5p	CSNK2A1	0	0	1	1
hsa-let-7e-5p	SNX16	1	0	1	2
hsa-let-7e-5p	INSR	1	0	1	2
hsa-let-7e-5p	SQLE	0	1	0	1
hsa-let-7e-5p	FAM160B2	0	0	1	1
hsa-let-7e-5p	YWHAE	0	1	0	1
hsa-let-7e-5p	TAB2	1	0	1	2
hsa-let-7e-5p	EPPIN	1	0	0	1
hsa-let-7e-5p	FBXL12	1	0	0	1
hsa-let-7e-5p	THBS1	1	1	1	3
hsa-let-7e-5p	STAM	0	1	0	1
hsa-let-7e-5p	SLC16A9	1	1	1	3
hsa-let-7e-5p	RPL10	0	1	0	1
hsa-let-7e-5p	C15orf41	1	0	1	2
hsa-let-7e-5p	ZNF24	0	0	1	1
hsa-let-7e-5p	ZC3HAV1L	0	1	1	2
hsa-let-7e-5p	VGLL4	0	1	0	1
hsa-let-7e-5p	PSD3	0	1	0	1
hsa-let-7e-5p	RDH10	1	0	1	2
hsa-let-7e-5p	ANKRA2	1	0	0	1
hsa-let-7e-5p	KDM3A	1	0	1	2
hsa-let-7e-5p	TOB2	0	0	1	1
hsa-let-7e-5p	CPM	1	0	1	2
hsa-let-7e-5p	ZBTB10	1	0	1	2
hsa-let-7e-5p	IRS2	1	1	1	3
hsa-let-7e-5p	PTPRU	0	0	1	1
hsa-let-7e-5p	DMRT2	1	0	0	1
hsa-let-7e-5p	CACNG4	0	0	1	1
hsa-let-7e-5p	TTC14	1	0	0	1
hsa-let-7e-5p	RNF152	0	0	1	1
hsa-let-7e-5p	ODF2L	1	0	0	1
hsa-let-7e-5p	ERGIC1	1	0	1	2
hsa-let-7e-5p	LCORL	1	0	1	2
hsa-let-7e-5p	GABPB1	0	1	0	1
hsa-let-7e-5p	SLK	1	0	1	2
hsa-let-7e-5p	SLC22A23	1	0	1	2
hsa-let-7e-5p	DDTL	1	0	0	1
hsa-let-7e-5p	POTEE	0	0	1	1
hsa-let-7e-5p	KLF8	1	0	1	2
hsa-let-7e-5p	DOCK1	1	0	0	1
hsa-let-7e-5p	ATG12	0	1	0	1
hsa-let-7e-5p	FSD2	0	0	1	1
hsa-let-7e-5p	USP47	0	1	1	2
hsa-let-7e-5p	BRWD3	1	0	1	2
hsa-let-7e-5p	ATPAF1	0	0	1	1
hsa-let-7e-5p	ZNF566	1	1	1	3
hsa-let-7e-5p	PIAS4	0	0	1	1
hsa-let-7e-5p	ERVH48-1	1	0	0	1
hsa-let-7e-5p	MDM4	1	1	1	3
hsa-let-7e-5p	DNAJC10	0	0	1	1
hsa-let-7e-5p	DDN	0	0	1	1
hsa-let-7e-5p	SOCS4	1	0	1	2
hsa-let-7e-5p	FBXO22	1	0	0	1
hsa-let-7e-5p	ITGA3	0	1	0	1
hsa-let-7e-5p	ADRB2	1	0	1	2
hsa-let-7e-5p	SMAP1	1	0	0	1
hsa-let-7e-5p	PXMP4	0	0	1	1
hsa-let-7e-5p	SUPT4H1	0	1	0	1
hsa-let-7e-5p	EDEM3	1	1	1	3
hsa-let-7e-5p	ZNF451	0	1	1	2
hsa-let-7e-5p	ZNF341	1	0	1	2
hsa-let-7e-5p	MUC5AC	1	0	0	1
hsa-let-7e-5p	DTX2	1	0	1	2
hsa-let-7e-5p	RFX5	1	0	0	1
hsa-let-7e-5p	NRK	1	0	1	2
hsa-let-7e-5p	FOPNL	1	0	1	2
hsa-let-7e-5p	ARMT1	1	0	0	1
hsa-let-7e-5p	TNFAIP3	0	1	1	2
hsa-let-7e-5p	EFHD2	1	1	1	3
hsa-let-7e-5p	GXYLT1	1	0	1	2
hsa-let-7e-5p	SPTBN4	1	0	1	2
hsa-let-7e-5p	CRB2	1	0	1	2
hsa-let-7e-5p	WDR37	1	0	1	2
hsa-let-7e-5p	RAB30	0	0	1	1
hsa-let-7e-5p	YBX2	0	0	1	1
hsa-let-7e-5p	EIF4A3	0	1	0	1
hsa-let-7e-5p	WNT9A	0	0	1	1
hsa-let-7e-5p	ZBTB16	0	0	1	1
hsa-let-7e-5p	NUCB2	0	1	0	1
hsa-let-7e-5p	ZFAND4	0	1	0	1
hsa-let-7e-5p	SYNC	1	0	0	1
hsa-let-7e-5p	DOK3	1	0	0	1
hsa-let-7e-5p	NHLRC3	1	1	1	3
hsa-let-7e-5p	GALNT2	1	0	1	2
hsa-let-7e-5p	CNOT6L	1	0	1	2
hsa-let-7e-5p	ABL2	1	0	1	2
hsa-let-7e-5p	RPS27	0	1	0	1
hsa-let-7e-5p	RNF165	1	0	1	2
hsa-let-7e-5p	BACE2	0	0	1	1
hsa-let-7e-5p	KCTD21	1	1	1	3
hsa-let-7e-5p	SLC25A4	0	0	1	1
hsa-let-7e-5p	RMND5A	0	1	0	1
hsa-let-7e-5p	OTOF	1	0	1	2
hsa-let-7e-5p	DCAF8	0	1	1	2
hsa-let-7e-5p	EIF4A1	0	1	0	1
hsa-let-7e-5p	ALKBH1	0	0	1	1
hsa-let-7e-5p	P4HA2	1	0	1	2
hsa-let-7e-5p	MYRIP	1	0	1	2
hsa-let-7e-5p	E2F6	1	1	1	3
hsa-let-7e-5p	HNRNPUL1	0	1	0	1
hsa-let-7e-5p	AC023632.1	0	0	1	1
hsa-let-7e-5p	THOC2	1	0	1	2
hsa-let-7e-5p	OPA3	1	1	0	2
hsa-let-7e-5p	DKK3	1	0	1	2
hsa-let-7e-5p	ITGB3	1	0	1	2
hsa-let-7e-5p	SRSF2	0	1	0	1
hsa-let-7e-5p	NOLC1	0	1	0	1
hsa-let-7e-5p	EDN1	1	1	1	3
hsa-let-7e-5p	CCSAP	0	0	1	1
hsa-let-7e-5p	SLC38A2	0	1	0	1
hsa-let-7e-5p	CDK8	0	0	1	1
hsa-let-7e-5p	ANKRD28	1	0	1	2
hsa-let-7e-5p	LRFN4	1	0	1	2
hsa-let-7e-5p	RB1	1	0	1	2
hsa-let-7e-5p	CRX	0	1	0	1
hsa-let-7e-5p	TNIK	0	0	1	1
hsa-let-7e-5p	FOXN3	1	0	0	1
hsa-let-7e-5p	DAGLA	1	0	1	2
hsa-let-7e-5p	ROBO1	0	0	1	1
hsa-let-7e-5p	TRIB1	1	0	1	2
hsa-let-7e-5p	C9orf40	0	0	1	1
hsa-let-7e-5p	FAM214B	1	0	1	2
hsa-let-7e-5p	MTMR3	0	0	1	1
hsa-let-7e-5p	TEAD3	1	0	1	2
hsa-let-7e-5p	CRY2	1	1	1	3
hsa-let-7e-5p	PARP16	0	1	0	1
hsa-let-7e-5p	ELK4	1	0	1	2
hsa-let-7e-5p	STRBP	1	0	1	2
hsa-let-7e-5p	SENP5	1	0	1	2
hsa-let-7e-5p	AGBL1	1	0	0	1
hsa-let-7e-5p	WDFY4	0	0	1	1
hsa-let-7e-5p	KCNC2	1	0	1	2
hsa-let-7e-5p	HLA-C	0	1	0	1
hsa-let-7e-5p	CA5B	0	1	0	1
hsa-let-7e-5p	TREML1	1	0	0	1
hsa-let-7e-5p	DPF2	0	0	1	1
hsa-let-7e-5p	YWHAQ	0	1	0	1
hsa-let-7e-5p	ARID3A	1	1	1	3
hsa-let-7e-5p	KCNQ4	1	0	1	2
hsa-let-7e-5p	EXOC6B	1	0	0	1
hsa-let-7e-5p	MSMO1	0	1	0	1
hsa-let-7e-5p	ACVR1B	0	0	1	1
hsa-let-7e-5p	SCMH1	0	1	0	1
hsa-let-7e-5p	ZNF611	0	1	0	1
hsa-let-7e-5p	DAPK2	1	0	0	1
hsa-let-7e-5p	AAK1	1	0	1	2
hsa-let-7e-5p	BMPR1A	0	0	1	1
hsa-let-7e-5p	HMGB1	0	1	0	1
hsa-let-7e-5p	ZSWIM4	0	0	1	1
hsa-let-7e-5p	ATAD2B	1	0	1	2
hsa-let-7e-5p	ABT1	1	1	0	2
hsa-let-7e-5p	BEND4	1	1	1	3
hsa-let-7e-5p	IPO9	0	1	1	2
hsa-let-7e-5p	LIMD2	1	1	1	3
hsa-let-7e-5p	RBM4	0	1	0	1
hsa-let-7e-5p	SNAP23	1	0	1	2
hsa-let-7e-5p	GFM2	1	0	0	1
hsa-let-7e-5p	CECR2	0	0	1	1
hsa-let-7e-5p	PIK3CA	1	0	1	2
hsa-let-7e-5p	ERCC4	1	0	1	2
hsa-let-7e-5p	LIPT2	1	0	1	2
hsa-let-7e-5p	ZCCHC3	0	1	1	2
hsa-let-7e-5p	ATXN2L	0	1	0	1
hsa-let-7e-5p	TRIM41	1	0	1	2
hsa-let-7e-5p	THRB	1	0	0	1
hsa-let-7e-5p	ZDHHC23	1	0	0	1
hsa-let-7e-5p	CASTOR2	0	1	0	1
hsa-let-7e-5p	SOX13	1	0	1	2
hsa-let-7e-5p	HIC1	0	0	1	1
hsa-let-7e-5p	GHR	1	0	1	2
hsa-let-7e-5p	TSPYL5	1	0	1	2
hsa-let-7e-5p	CPEB1	1	0	1	2
hsa-let-7e-5p	CANT1	1	0	1	2
hsa-let-7e-5p	DLST	1	0	1	2
hsa-let-7e-5p	DUSP9	0	0	1	1
hsa-let-7e-5p	FXN	0	1	0	1
hsa-let-7e-5p	HOXA1	1	0	1	2
hsa-let-7e-5p	DIAPH1	0	1	0	1
hsa-let-7e-5p	FBXL20	0	1	0	1
hsa-let-7e-5p	SPCS2	0	1	0	1
hsa-let-7e-5p	TTC39C	0	0	1	1
hsa-let-7e-5p	UBE2G2	1	0	1	2
hsa-let-7e-5p	IFI44L	1	0	0	1
hsa-let-7e-5p	RCSD1	0	0	1	1
hsa-let-7e-5p	GCNT4	1	0	1	2
hsa-let-7e-5p	SEMA4G	1	0	1	2
hsa-let-7e-5p	CAP1	1	0	0	1
hsa-let-7e-5p	DPH1	0	0	1	1
hsa-let-7e-5p	PCGF3	1	1	1	3
hsa-let-7e-5p	SMARCC1	1	0	1	2
hsa-let-7e-5p	AGO2	0	1	0	1
hsa-let-7e-5p	MPST	0	0	1	1
hsa-let-7e-5p	HIF3A	1	0	1	2
hsa-let-7e-5p	COL11A1	0	0	1	1
hsa-let-7e-5p	CRTAM	1	0	0	1
hsa-let-7e-5p	MRS2	1	0	1	2
hsa-let-7e-5p	TMX4	1	0	1	2
hsa-let-7e-5p	TSPAN2	1	0	1	2
hsa-let-7e-5p	VASH2	1	0	1	2
hsa-let-7e-5p	NCKAP5L	0	1	0	1
hsa-let-7e-5p	UBE2K	1	0	0	1
hsa-let-7e-5p	MOB1A	1	0	0	1
hsa-let-7e-5p	NIPAL4	1	0	1	2
hsa-let-7e-5p	AMPD2	0	1	0	1
hsa-let-7e-5p	CYP4F2	1	0	0	1
hsa-let-7e-5p	KMT2E	0	0	1	1
hsa-let-7e-5p	SYNCRIP	1	0	1	2
hsa-let-7e-5p	UGT3A1	1	0	0	1
hsa-let-7e-5p	LRRC20	0	1	1	2
hsa-let-7e-5p	THRA	0	0	1	1
hsa-let-7e-5p	CDCA8	1	0	1	2
hsa-let-7e-5p	SPTBN1	0	1	0	1
hsa-let-7e-5p	NDUFS5	0	1	0	1
hsa-let-7e-5p	CHSY3	1	0	1	2
hsa-let-7e-5p	FAM104A	1	1	1	3
hsa-let-7e-5p	TET3	1	0	1	2
hsa-let-7e-5p	NUDT15	1	1	0	2
hsa-let-7e-5p	KCNC4	0	0	1	1
hsa-let-7e-5p	WDFY2	0	0	1	1
hsa-let-7e-5p	AP1S1	1	1	1	3
hsa-let-7e-5p	SEC31B	1	0	1	2
hsa-let-7e-5p	GRPEL2	1	1	1	3
hsa-let-7e-5p	HMGA1	1	1	1	3
hsa-let-7e-5p	KCTD17	1	0	1	2
hsa-let-7e-5p	SREK1IP1	1	0	1	2
hsa-let-7e-5p	PHOSPHO2-KLHL23	1	0	0	1
hsa-let-7e-5p	ZNF264	0	1	0	1
hsa-let-7e-5p	ATP8B4	1	0	1	2
hsa-let-7e-5p	CTDSPL2	0	0	1	1
hsa-let-7e-5p	IGF2BP2	1	0	1	2
hsa-let-7e-5p	PPP2R2A	1	1	1	3
hsa-let-7e-5p	CTB-54O9.9	0	0	1	1
hsa-let-7e-5p	HIST2H2BF	0	1	0	1
hsa-let-7e-5p	TMPRSS2	1	0	1	2
hsa-let-7e-5p	PHF3	0	1	0	1
hsa-let-7e-5p	COL1A2	1	0	1	2
hsa-let-7e-5p	TDRD7	0	1	0	1
hsa-let-7e-5p	KIAA0930	1	1	1	3
hsa-let-7e-5p	MATR3	0	1	0	1
hsa-let-7e-5p	SERBP1	0	1	0	1
hsa-let-7e-5p	NCOA3	0	1	0	1
hsa-let-7e-5p	AC140061.12	0	0	1	1
hsa-let-7e-5p	XRN1	1	0	1	2
hsa-let-7e-5p	HOXB1	0	0	1	1
hsa-let-7e-5p	UHRF2	1	0	1	2
hsa-let-7e-5p	TTL	1	0	1	2
hsa-let-7e-5p	SNX30	1	0	1	2
hsa-let-7e-5p	GNAL	0	0	1	1
hsa-let-7e-5p	JOSD1	0	0	1	1
hsa-let-7e-5p	NOS1	0	0	1	1
hsa-let-7e-5p	SMUG1	1	0	1	2
hsa-let-7e-5p	SMCR8	1	1	1	3
hsa-let-7e-5p	ZNF556	0	1	0	1
hsa-let-7e-5p	GAS7	1	0	1	2
hsa-let-7e-5p	CHD7	0	1	1	2
hsa-let-7e-5p	IMPG2	1	0	1	2
hsa-let-7e-5p	PLXNC1	1	0	1	2
hsa-let-7e-5p	MAPK6	1	1	1	3
hsa-let-7e-5p	SGSM3	0	1	0	1
hsa-let-7e-5p	FBXO45	1	0	1	2
hsa-let-7e-5p	THADA	0	1	0	1
hsa-let-7e-5p	ENTPD7	1	0	1	2
hsa-let-7e-5p	PPP1R15B	1	1	1	3
hsa-let-7e-5p	YWHAZ	0	1	0	1
hsa-let-7e-5p	USP49	1	0	1	2
hsa-let-7e-5p	PRSS22	1	1	1	3
hsa-let-7e-5p	MICALCL	0	0	1	1
hsa-let-7e-5p	DNAH9	0	1	0	1
hsa-let-7e-5p	GSG1L	0	0	1	1
hsa-let-7e-5p	TUBB2A	0	1	0	1
hsa-let-7e-5p	SNAI3	1	0	0	1
hsa-let-7e-5p	SEC23IP	0	1	0	1
hsa-let-7e-5p	XKR4	0	0	1	1
hsa-let-7e-5p	TRANK1	1	0	1	2
hsa-let-7e-5p	SLC45A4	1	0	1	2
hsa-let-7e-5p	OR7D2	0	1	0	1
hsa-let-7e-5p	GRIN2B	0	0	1	1
hsa-let-7e-5p	CHST3	1	0	1	2
hsa-let-7e-5p	CREB3L2	1	0	0	1
hsa-let-7e-5p	NOVA1	1	0	1	2
hsa-let-7e-5p	FGF11	1	0	1	2
hsa-let-7e-5p	TAOK1	0	0	1	1
hsa-let-7e-5p	SLC12A7	0	1	0	1
hsa-let-7e-5p	ARNT2	0	1	0	1
hsa-let-7e-5p	PDE12	1	1	1	3
hsa-let-7e-5p	SLC38A9	1	0	1	2
hsa-let-7e-5p	GAB2	1	0	1	2
hsa-let-7e-5p	AMOT	1	0	1	2
hsa-let-7e-5p	TECPR2	1	0	1	2
hsa-let-7e-5p	QDPR	0	1	0	1
hsa-let-7e-5p	IQCB1	1	0	1	2
hsa-let-7e-5p	GYG2	1	0	1	2
hsa-let-7e-5p	NXT2	0	0	1	1
hsa-let-7e-5p	COX10	0	1	0	1
hsa-let-7e-5p	EZH2	0	1	0	1
hsa-let-7e-5p	MVB12B	0	0	1	1
hsa-let-7e-5p	GPR137C	0	0	1	1
hsa-let-7e-5p	WDR48	0	1	0	1
hsa-let-7e-5p	ZNF74	0	0	1	1
hsa-let-7e-5p	CDC25A	1	0	1	2
hsa-let-7e-5p	BLOC1S5	0	0	1	1
hsa-let-7e-5p	CPD	0	0	1	1
hsa-let-7e-5p	ICK	0	0	1	1
hsa-let-7e-5p	CCDC97	0	1	0	1
hsa-let-7e-5p	CDK6	0	0	1	1
hsa-let-7e-5p	DTX4	1	0	1	2
hsa-let-7e-5p	MEIS1	0	0	1	1
hsa-let-7e-5p	ENAM	1	0	0	1
hsa-let-7e-5p	ARPP19	1	0	1	2
hsa-let-7e-5p	PNKD	1	0	0	1
hsa-let-7e-5p	CHD4	1	0	1	2
hsa-let-7e-5p	MDFI	1	0	1	2
hsa-let-7e-5p	TUBB4A	0	1	0	1
hsa-let-7e-5p	DNAH10OS	0	0	1	1
hsa-let-7e-5p	FGF5	0	0	1	1
hsa-let-7e-5p	DYNC2LI1	1	0	0	1
hsa-let-7e-5p	CEP164	1	0	1	2
hsa-let-7e-5p	RBFOX1	1	0	1	2
hsa-let-7e-5p	PBX3	1	0	1	2
hsa-let-7e-5p	DISC1	0	1	0	1
hsa-let-7e-5p	C11orf84	0	0	1	1
hsa-let-7e-5p	EMB	0	0	1	1
hsa-let-7e-5p	2020-03-05	0	1	0	1
hsa-let-7e-5p	EPHB1	1	0	0	1
hsa-let-7e-5p	NCKIPSD	0	1	0	1
hsa-let-7e-5p	TAF9B	1	0	1	2
hsa-let-7e-5p	USP38	1	1	1	3
hsa-let-7e-5p	RTCA	0	0	1	1
hsa-let-7e-5p	ZNF763	1	0	0	1
hsa-let-7e-5p	C6orf211	0	0	1	1
hsa-let-7e-5p	PIGA	1	0	1	2
hsa-let-7e-5p	IL13	1	0	1	2
hsa-let-7e-5p	PHACTR2	0	0	1	1
hsa-let-7e-5p	KIAA0100	0	1	0	1
hsa-let-7e-5p	SCGB2B2	1	0	0	1
hsa-let-7e-5p	ZNF740	0	0	1	1
hsa-let-7e-5p	AFF2	1	0	1	2
hsa-let-7e-5p	PLXNA4	1	0	1	2
hsa-let-7e-5p	CCR7	1	0	1	2
hsa-let-7e-5p	BAZ1B	0	1	0	1
hsa-let-7e-5p	FASLG	1	1	1	3
hsa-let-7e-5p	XKR7	0	0	1	1
hsa-let-7e-5p	OTUD3	0	0	1	1
hsa-let-7e-5p	IRS4	0	1	0	1
hsa-let-7e-5p	CDCA3	0	1	0	1
hsa-let-7e-5p	HOXA9	1	0	1	2
hsa-let-7e-5p	DUSP1	1	1	1	3
hsa-let-7e-5p	GPR132	1	0	1	2
hsa-let-7e-5p	TGFBR1	1	0	1	2
hsa-let-7e-5p	APC2	0	0	1	1
hsa-let-7e-5p	STK40	1	0	1	2
hsa-let-7e-5p	TGOLN2	0	1	0	1
hsa-let-7e-5p	ZCCHC10	1	0	0	1
hsa-let-7e-5p	SUCLG2	1	0	1	2
hsa-let-7e-5p	TERF1	0	1	0	1
hsa-let-7e-5p	FNDC3A	1	1	1	3
hsa-let-7e-5p	MIEF1	1	1	1	3
hsa-let-7e-5p	BRF2	1	0	0	1
hsa-let-7e-5p	AHCTF1	1	0	1	2
hsa-let-7e-5p	IVD	0	1	0	1
hsa-let-7e-5p	AK3	1	0	0	1
hsa-let-7e-5p	RSF1	0	0	1	1
hsa-let-7e-5p	MYC	0	1	0	1
hsa-let-7e-5p	TGFBR3	1	1	1	3
hsa-let-7e-5p	HTR1E	1	0	1	2
hsa-let-7e-5p	DAAM1	0	1	0	1
hsa-let-7e-5p	DUSP16	1	0	1	2
hsa-let-7e-5p	IGF1	1	1	1	3
hsa-let-7e-5p	HIP1	1	0	1	2
hsa-let-7e-5p	ARHGAP28	1	0	1	2
hsa-let-7e-5p	COX16	0	1	0	1
hsa-let-7e-5p	TMEM251	0	0	1	1
hsa-let-7e-5p	CDK14	0	0	1	1
hsa-let-7e-5p	CD200R1	1	0	1	2
hsa-let-7e-5p	EHF	1	0	0	1
hsa-let-7e-5p	IKBKAP	1	0	1	2
hsa-let-7e-5p	CACNB4	1	0	1	2
hsa-let-7e-5p	MTMR14	0	1	0	1
hsa-let-7e-5p	A1CF	1	0	1	2
hsa-let-7e-5p	TTC31	0	0	1	1
hsa-let-7e-5p	PYGO2	0	0	1	1
hsa-let-7e-5p	IGF2BP1	1	1	1	3
hsa-let-7e-5p	MTDH	1	0	1	2
hsa-let-7e-5p	PDZD8	0	1	1	2
hsa-let-7e-5p	UNC5A	0	0	1	1
hsa-let-7e-5p	PDSS1	0	0	1	1
hsa-let-7e-5p	POU2F1	1	0	1	2
hsa-let-7e-5p	RNF38	1	0	1	2
hsa-let-7e-5p	BCL7A	1	0	1	2
hsa-let-7e-5p	NLK	0	0	1	1
hsa-let-7e-5p	KHNYN	1	0	1	2
hsa-let-7e-5p	ALPK3	0	0	1	1
hsa-let-7e-5p	POTEM	1	1	1	3
hsa-let-7e-5p	DSG3	0	0	1	1
hsa-let-7e-5p	DUSP7	1	0	1	2
hsa-let-7e-5p	RGPD8	1	0	0	1
hsa-let-7e-5p	SLC9A9	1	0	1	2
hsa-let-7e-5p	RWDD1	0	1	0	1
hsa-let-7e-5p	FOXP2	1	0	1	2
hsa-let-7e-5p	PLD5	1	0	1	2
hsa-let-7e-5p	GRID2IP	1	0	1	2
hsa-let-7e-5p	FAM122A	1	0	0	1
hsa-let-7e-5p	USP21	0	0	1	1
hsa-let-7e-5p	TMEM135	0	0	1	1
hsa-let-7e-5p	TENM2	1	0	1	2
hsa-let-7e-5p	SNN	1	0	1	2
hsa-let-7e-5p	RNF144B	0	1	0	1
hsa-let-7e-5p	CHUK	0	0	1	1
hsa-let-7e-5p	SEMA4B	0	1	0	1
hsa-let-7e-5p	TMEM144	1	0	0	1
hsa-let-7e-5p	STARD4	1	0	0	1
hsa-let-7e-5p	CD164	1	0	0	1
hsa-let-7e-5p	CEP120	1	1	0	2
hsa-let-7e-5p	ATXN7L3	0	1	1	2
hsa-let-7e-5p	ND3	0	1	0	1
hsa-let-7e-5p	DNAL1	0	1	1	2
hsa-let-7e-5p	LSM11	1	0	1	2
hsa-let-7e-5p	NPEPL1	1	0	1	2
hsa-let-7e-5p	GDPD1	1	0	1	2
hsa-let-7e-5p	ARCN1	0	1	0	1
hsa-let-7e-5p	MTX3	0	1	0	1
hsa-let-7e-5p	KREMEN1	1	1	1	3
hsa-let-7e-5p	MYCN	1	1	1	3
hsa-let-7e-5p	SETD1A	0	1	0	1
hsa-let-7e-5p	RADIL	0	0	1	1
hsa-let-7e-5p	CCDC113	0	1	0	1
hsa-let-7e-5p	CENPP	0	1	0	1
hsa-let-7e-5p	KATNB1	0	1	0	1
hsa-let-7e-5p	MAP3K13	0	0	1	1
hsa-let-7e-5p	ONECUT3	0	0	1	1
hsa-let-7e-5p	SREK1	0	0	1	1
hsa-let-7e-5p	PLCXD3	1	0	1	2
hsa-let-7e-5p	STAT3	0	1	1	2
hsa-let-7e-5p	PLD3	1	1	1	3
hsa-let-7e-5p	AGO4	1	0	1	2
hsa-let-7e-5p	DNAJC1	1	0	1	2
hsa-let-7e-5p	PEX11B	1	1	1	3
hsa-let-7e-5p	MAGEA12	0	1	0	1
hsa-let-7e-5p	ITGB8	1	0	1	2
hsa-let-7e-5p	LIN28B	1	0	1	2
hsa-let-7e-5p	ATP6	0	1	0	1
hsa-let-7e-5p	ZNF362	0	0	1	1
hsa-let-7e-5p	RHD	0	1	0	1
hsa-let-7e-5p	ABCC5	1	0	1	2
hsa-let-7e-5p	KLK10	1	0	1	2
hsa-let-7e-5p	GPR63	0	0	1	1
hsa-let-7e-5p	FUT10	0	1	0	1
hsa-let-7e-5p	TMEM233	0	0	1	1
hsa-let-7e-5p	PLCXD1	0	1	0	1
hsa-let-7e-5p	KIAA0895	1	0	0	1
hsa-let-7e-5p	IFT80	1	0	0	1
hsa-let-7e-5p	DMP1	1	0	1	2
hsa-let-7e-5p	LCOR	0	0	1	1
hsa-let-7e-5p	REEP1	1	0	1	2
hsa-let-7e-5p	WASL	0	1	1	2
hsa-let-7e-5p	OLFM4	1	0	0	1
hsa-let-7e-5p	ARID1B	1	0	0	1
hsa-let-7e-5p	CCNF	0	0	1	1
hsa-let-7e-5p	NRARP	1	0	0	1
hsa-let-7e-5p	CASP3	1	0	1	2
hsa-let-7e-5p	ECHDC1	1	1	0	2
hsa-let-7e-5p	SLC25A24	1	0	1	2
hsa-let-7e-5p	SPN	0	1	0	1
hsa-let-7e-5p	ANKRD49	1	0	0	1
hsa-let-7e-5p	CACFD1	0	0	1	1
hsa-let-7e-5p	MAP3K9	1	0	1	2
hsa-let-7e-5p	FGD6	1	0	1	2
hsa-let-7e-5p	LRIG3	1	1	1	3
hsa-let-7e-5p	KLF9	1	0	1	2
hsa-let-7e-5p	MBTPS2	1	0	1	2
hsa-let-7e-5p	SERPINB9	1	0	0	1
hsa-let-7e-5p	MXD1	1	1	1	3
hsa-let-7e-5p	ARMC9	1	0	0	1
hsa-let-7e-5p	HIF1AN	1	1	1	3
hsa-let-7e-5p	C11orf91	0	1	0	1
hsa-let-7e-5p	RP1-170O19.20	0	0	1	1
hsa-let-7e-5p	TMEM110	1	0	1	2
hsa-let-7e-5p	LRRC8A	0	1	0	1
hsa-let-7e-5p	VEZT	0	0	1	1
hsa-let-7e-5p	ERO1L	0	0	1	1
hsa-let-7e-5p	AGPAT6	0	0	1	1
hsa-let-7e-5p	LMNA	0	1	0	1
hsa-let-7e-5p	PRLR	1	0	1	2
hsa-let-7e-5p	STOX2	1	0	1	2
hsa-let-7e-5p	PCYT1B	0	0	1	1
hsa-let-7e-5p	C19orf53	0	1	0	1
hsa-let-7e-5p	ADCY9	0	0	1	1
hsa-let-7e-5p	PTK2	0	1	0	1
hsa-miR-1207-5p	NEK7	0	0	1	1
hsa-miR-1207-5p	TNFRSF11A	0	0	1	1
hsa-miR-1207-5p	VDR	1	0	1	2
hsa-miR-1207-5p	SMC4	0	1	1	2
hsa-miR-1207-5p	ETV5	0	0	1	1
hsa-miR-1207-5p	FAHD2A	0	0	1	1
hsa-miR-1207-5p	PARP2	0	0	1	1
hsa-miR-1207-5p	JAKMIP3	1	0	1	2
hsa-miR-1207-5p	KMT2D	0	0	1	1
hsa-miR-1207-5p	USP3	0	0	1	1
hsa-miR-1207-5p	ZBTB16	0	0	1	1
hsa-miR-1207-5p	SIX5	1	0	1	2
hsa-miR-1207-5p	TAF7L	0	0	1	1
hsa-miR-1207-5p	KIR2DL3	0	0	1	1
hsa-miR-1207-5p	ZNF385A	0	0	1	1
hsa-miR-1207-5p	PCDHGA2	0	0	1	1
hsa-miR-1207-5p	SV2C	1	0	1	2
hsa-miR-1207-5p	LMNA	1	0	0	1
hsa-miR-1207-5p	AP1B1	1	0	1	2
hsa-miR-1207-5p	ZFAT	0	0	1	1
hsa-miR-1207-5p	GABRA4	0	0	1	1
hsa-miR-1207-5p	TESPA1	0	0	1	1
hsa-miR-1207-5p	SYNPO2L	0	0	1	1
hsa-miR-1207-5p	C6orf89	1	0	1	2
hsa-miR-1207-5p	SLC25A19	1	0	1	2
hsa-miR-1207-5p	GAL3ST3	1	0	1	2
hsa-miR-1207-5p	S100A9	0	0	1	1
hsa-miR-1207-5p	CPSF4	0	0	1	1
hsa-miR-1207-5p	KCNB1	1	0	1	2
hsa-miR-1207-5p	MED20	0	0	1	1
hsa-miR-1207-5p	TGOLN2	0	0	1	1
hsa-miR-1207-5p	PFAS	0	0	1	1
hsa-miR-1207-5p	TOMM34	0	0	1	1
hsa-miR-1207-5p	ABCC5	1	0	1	2
hsa-miR-1207-5p	C22orf26	0	0	1	1
hsa-miR-1207-5p	FSTL3	1	0	1	2
hsa-miR-1207-5p	COQ10A	1	0	1	2
hsa-miR-1207-5p	SOX12	0	0	1	1
hsa-miR-1207-5p	KIAA0895L	0	0	1	1
hsa-miR-1207-5p	SBK1	1	0	1	2
hsa-miR-1207-5p	NICN1	0	0	1	1
hsa-miR-1207-5p	ZBTB8B	0	0	1	1
hsa-miR-1207-5p	HTR4	0	0	1	1
hsa-miR-1207-5p	ZNF8	0	0	1	1
hsa-miR-1207-5p	DGKK	1	0	0	1
hsa-miR-1207-5p	CDC42EP4	1	0	1	2
hsa-miR-1207-5p	CYP4B1	0	0	1	1
hsa-miR-1207-5p	LAS1L	0	0	1	1
hsa-miR-1207-5p	NECAP1	0	1	1	2
hsa-miR-1207-5p	GMEB2	0	0	1	1
hsa-miR-1207-5p	TMEM246	0	0	1	1
hsa-miR-1207-5p	KLRC3	0	0	1	1
hsa-miR-1207-5p	MAP3K3	0	0	1	1
hsa-miR-1207-5p	SLC35E1	0	0	1	1
hsa-miR-1207-5p	NIPA1	0	0	1	1
hsa-miR-1207-5p	CASP9	0	0	1	1
hsa-miR-1207-5p	SLC12A3	0	0	1	1
hsa-miR-1207-5p	PELP1	0	0	1	1
hsa-miR-1207-5p	NYNRIN	0	0	1	1
hsa-miR-1207-5p	CDKN2B	0	0	1	1
hsa-miR-1207-5p	IKZF3	0	0	1	1
hsa-miR-1207-5p	ABCA2	1	0	1	2
hsa-miR-1207-5p	FCHO1	0	0	1	1
hsa-miR-1207-5p	BNC2	0	0	1	1
hsa-miR-1207-5p	ATXN2L	1	0	1	2
hsa-miR-1207-5p	CLOCK	0	0	1	1
hsa-miR-1207-5p	TJP2	0	0	1	1
hsa-miR-1207-5p	CBLN3	0	0	1	1
hsa-miR-1207-5p	BAHD1	1	0	1	2
hsa-miR-1207-5p	ASB1	1	0	1	2
hsa-miR-1207-5p	GNAI2	1	0	1	2
hsa-miR-1207-5p	ZNF555	0	0	1	1
hsa-miR-1207-5p	SEC24A	0	0	1	1
hsa-miR-1207-5p	ATG9A	1	0	1	2
hsa-miR-1207-5p	CYTH4	0	0	1	1
hsa-miR-1207-5p	USP1	0	0	1	1
hsa-miR-1207-5p	ABI2	0	0	1	1
hsa-miR-1207-5p	VPS52	0	0	1	1
hsa-miR-1207-5p	CD96	0	0	1	1
hsa-miR-1207-5p	RANGAP1	1	1	1	3
hsa-miR-1207-5p	CACNG4	0	0	1	1
hsa-miR-1207-5p	NCAN	0	0	1	1
hsa-miR-1207-5p	CHML	0	0	1	1
hsa-miR-1207-5p	CMKLR1	0	0	1	1
hsa-miR-1207-5p	CLK2	0	0	1	1
hsa-miR-1207-5p	EVX1	0	0	1	1
hsa-miR-1207-5p	SPATA20	0	0	1	1
hsa-miR-1207-5p	SLC2A13	0	1	0	1
hsa-miR-1207-5p	ZNF132	0	0	1	1
hsa-miR-1207-5p	GRIN3A	0	0	1	1
hsa-miR-1207-5p	SNRNP48	0	0	1	1
hsa-miR-1207-5p	HDAC2	0	0	1	1
hsa-miR-1207-5p	AL033381.1	0	0	1	1
hsa-miR-1207-5p	EVC	1	0	1	2
hsa-miR-1207-5p	MPP2	1	0	1	2
hsa-miR-1207-5p	SH3RF3	0	0	1	1
hsa-miR-1207-5p	AP5S1	1	0	1	2
hsa-miR-1207-5p	ISL2	1	0	1	2
hsa-miR-1207-5p	POM121L7	0	0	1	1
hsa-miR-1207-5p	ULK2	0	0	1	1
hsa-miR-1207-5p	RHBDF2	0	0	1	1
hsa-miR-1207-5p	FIGN	0	0	1	1
hsa-miR-1207-5p	XRN1	0	0	1	1
hsa-miR-1207-5p	ATOH7	0	0	1	1
hsa-miR-1207-5p	RDH5	0	0	1	1
hsa-miR-1207-5p	MMS22L	0	0	1	1
hsa-miR-1207-5p	MAP1B	1	0	1	2
hsa-miR-1207-5p	XCR1	0	0	1	1
hsa-miR-1207-5p	UROS	0	0	1	1
hsa-miR-1207-5p	EFNB1	1	0	1	2
hsa-miR-1207-5p	RPL37A	0	1	1	2
hsa-miR-1207-5p	ACACA	1	1	1	3
hsa-miR-1207-5p	CMIP	0	0	1	1
hsa-miR-1207-5p	SNRNP40	0	0	1	1
hsa-miR-1207-5p	CDK2AP2	1	0	1	2
hsa-miR-1207-5p	SCD	0	0	1	1
hsa-miR-1207-5p	ERAP1	0	0	1	1
hsa-miR-1207-5p	CARD11	0	0	1	1
hsa-miR-1207-5p	ZNF169	0	0	1	1
hsa-miR-1207-5p	PRDM15	1	0	1	2
hsa-miR-1207-5p	ATP6V0B	0	0	1	1
hsa-miR-1207-5p	FAIM2	0	0	1	1
hsa-miR-1207-5p	ATM	0	0	1	1
hsa-miR-1207-5p	SPATA33	0	0	1	1
hsa-miR-1207-5p	MC2R	0	0	1	1
hsa-miR-1207-5p	HES7	0	0	1	1
hsa-miR-1207-5p	PATE1	1	0	1	2
hsa-miR-1207-5p	SEC31B	1	0	1	2
hsa-miR-1207-5p	CETN2	1	0	1	2
hsa-miR-1207-5p	PCDHGA11	0	0	1	1
hsa-miR-1207-5p	FBXL14	0	0	1	1
hsa-miR-1207-5p	ESRRB	0	0	1	1
hsa-miR-1207-5p	SPATA2	0	0	1	1
hsa-miR-1207-5p	TRABD2A	0	0	1	1
hsa-miR-1207-5p	VPS13A	0	0	1	1
hsa-miR-1207-5p	AEN	0	0	1	1
hsa-miR-1207-5p	SMIM12	0	0	1	1
hsa-miR-1207-5p	ERBB2	0	0	1	1
hsa-miR-1207-5p	C15orf52	0	0	1	1
hsa-miR-1207-5p	C6orf195	0	0	1	1
hsa-miR-1207-5p	CCDC22	0	0	1	1
hsa-miR-1207-5p	CRELD1	0	0	1	1
hsa-miR-1207-5p	STK10	0	0	1	1
hsa-miR-1207-5p	KIAA0087	0	0	1	1
hsa-miR-1207-5p	CCDC71	0	0	1	1
hsa-miR-1207-5p	APOA2	0	0	1	1
hsa-miR-1207-5p	TNFAIP8	0	0	1	1
hsa-miR-1207-5p	ZNF660	0	0	1	1
hsa-miR-1207-5p	CISD3	0	0	1	1
hsa-miR-1207-5p	HECTD3	1	0	1	2
hsa-miR-1207-5p	YARS2	0	0	1	1
hsa-miR-1207-5p	RHOC	0	0	1	1
hsa-miR-1207-5p	LRIG3	0	0	1	1
hsa-miR-1207-5p	LMF2	0	0	1	1
hsa-miR-1207-5p	SDF4	0	1	1	2
hsa-miR-1207-5p	ZXDB	0	1	1	2
hsa-miR-1207-5p	ZDHHC13	0	0	1	1
hsa-miR-1207-5p	C1orf229	0	1	1	2
hsa-miR-1207-5p	STARD3NL	0	0	1	1
hsa-miR-1207-5p	MKL1	1	0	0	1
hsa-miR-1207-5p	DMWD	1	0	1	2
hsa-miR-1207-5p	C14orf28	0	0	1	1
hsa-miR-1207-5p	GEMIN8	0	0	1	1
hsa-miR-1207-5p	ZNF385C	1	0	0	1
hsa-miR-1207-5p	GSTM4	0	0	1	1
hsa-miR-1207-5p	RUNDC3B	0	0	1	1
hsa-miR-1207-5p	LL22NC03-75H12.2	0	0	1	1
hsa-miR-1207-5p	SLC16A8	0	0	1	1
hsa-miR-1207-5p	OLR1	1	0	1	2
hsa-miR-1207-5p	TRAK1	0	0	1	1
hsa-miR-1207-5p	POLR3GL	1	0	1	2
hsa-miR-1207-5p	POMT1	0	0	1	1
[truncated: 153,820 more rows]
